# Supplementary material for: Expression and Regulatory Network Analysis of miR-140-3p, a New Potential Serum Biomarker for Autism Spectrum Disorder
Source: Front Mol Neurosci. 2017 Aug 10;10:250. doi: 10.3389/fnmol.2017.00250 (PMC5554380; doi:10.3389/fnmol.2017.00250)
Supplement: Supplementary File 5 — Data from network functional analysis. [file DataSheet5.xlsx]

## Sheet: Index
1. Node genes from miR-140-3p-mediated regulatory network.
2. Over-represented GO Biological Process terms in miR-140-3p-mediated regulatory network compared to the entire genome.
3. Over-represented GO Cellular Component terms in miR-140-3p-mediated regulatory network compared to the entire genome.
4. Over-represented GO Molecular Function terms in miR-140-3p-mediated regulatory network compared to the entire genome.
5. Over-represented DO terms in miR-140-3p-mediated regulatory network compared to the entire genome.
6. Over-represented KEGG Pathway terms in miR-140-3p-mediated regulatory network compared to the entire genome.
7. Over-represented Reactome Pathway terms in miR-140-3p-mediated regulatory network compared to the entire genome.

## Sheet: 1. Node genes
Node Gene Symbol	Degree within the network
NRIP1	76
POLR2A	61
EP300	50
E2F1	41
ESR1	39
PHF8	37
TAF1	36
HDAC1	32
JUN	32
NR3C1	31
CD38	30
HDAC3	30
BRCA1	29
HDAC2	29
RAD21	29
RXRA	29
STAT3	29
RARA	26
DNMT1	24
AR	23
CHD2	22
XPO1	22
YWHAQ	22
RXRB	21
KAT2B	20
REST	20
SRF	20
ESR2	19
LCK	19
PPARD	19
ZNF143	19
HNF4A	18
PPARG	18
APP	17
CTBP1	17
ESRRA	16
NR1H3	16
PPARGC1A	16
YWHAH	16
KPNB1	15
ARPC3	14
HDAC5	14
PRMT1	14
THRA	14
THRB	14
TNFRSF14	13
VDR	13
CTBP2	12
NR2C1	12
MAP3K7	11
NR0B1	11
NR1H2	11
CDK8	10
CEP70	10
MIR611	10
MIR659	10
ZAP70	10
AHR	9
CBL	9
DNMT3A	9
NR5A1	9
CARM1	8
CD247	8
MIR20B	8
NR3C2	8
PPARA	8
TRAF2	8
CCDC85B	7
CD4	7
CIB1	7
CSE1L	7
DNMT3B	7
ESRRG	7
FHL1	7
MIR584	7
FCGR3A	6
MIR20A	6
MIR376C	6
MIR760	6
NR5A2	6
ACTN2	5
CD3E	5
CD9	5
MIR192	5
MIR215	5
MIR302A	5
MIR302B	5
MIR302C	5
MIR568	5
MIR607	5
MIR640	5
MIR708	5
TULP3	5
ESRRB	4
LDOC1	4
MAGEA10	4
MIR27B	4
MIR507	4
MIR518F	4
PECAM1	4
ZNF366	4
MIR186	3
MIR557	3
MIR573	3
MIR579	3
MIR610	3
MIR140	2
MIR489	2
MIR591	2
RORB	1
TEX11	1

## Sheet: 2. GO BP terms
Term ID	Term Description	Gene Ratio	Background Ratio	BH adjusted p-value	Annotated Node Genes	Count
GO:0043401	steroid hormone mediated signaling pathway	33/83	177/16672	8.13627e-41	AR/BRCA1/CARM1/EP300/ESR1/ESR2/ESRRA/ESRRB/ESRRG/HDAC1/HNF4A/NR0B1/NR1H2/NR1H3/NR2C1/NR3C1/NR3C2/NR5A1/NR5A2/NRIP1/PPARA/PPARD/PPARG/PPARGC1A/RARA/RORB/RXRA/RXRB/THRA/THRB/VDR/YWHAH/ZNF366	33
GO:0071383	cellular response to steroid hormone stimulus	35/83	232/16672	1.43754e-40	AR/BRCA1/CARM1/DNMT3B/EP300/ESR1/ESR2/ESRRA/ESRRB/ESRRG/HDAC1/HNF4A/NR0B1/NR1H2/NR1H3/NR2C1/NR3C1/NR3C2/NR5A1/NR5A2/NRIP1/PPARA/PPARD/PPARG/PPARGC1A/RARA/REST/RORB/RXRA/RXRB/THRA/THRB/VDR/YWHAH/ZNF366	35
GO:0030522	intracellular receptor signaling pathway	36/83	260/16672	1.43754e-40	AHR/AR/BRCA1/CARM1/CTBP2/EP300/ESR1/ESR2/ESRRA/ESRRB/ESRRG/HDAC1/HNF4A/MAP3K7/NR0B1/NR1H2/NR1H3/NR2C1/NR3C1/NR5A1/NR5A2/NRIP1/PPARA/PPARD/PPARG/PPARGC1A/RARA/RORB/RXRA/RXRB/STAT3/THRA/THRB/VDR/YWHAH/ZNF366	36
GO:0009755	hormone-mediated signaling pathway	33/83	213/16672	1.45473e-38	AR/BRCA1/CARM1/EP300/ESR1/ESR2/ESRRA/ESRRB/ESRRG/HDAC1/HNF4A/NR0B1/NR1H2/NR1H3/NR2C1/NR3C1/NR3C2/NR5A1/NR5A2/NRIP1/PPARA/PPARD/PPARG/PPARGC1A/RARA/RORB/RXRA/RXRB/THRA/THRB/VDR/YWHAH/ZNF366	33
GO:0006367	transcription initiation from RNA polymerase II promoter	31/83	173/16672	3.85659e-38	AR/CDK8/ESR1/ESR2/ESRRA/ESRRB/ESRRG/HNF4A/KAT2B/NR0B1/NR1H2/NR1H3/NR2C1/NR3C1/NR3C2/NR5A1/NR5A2/POLR2A/PPARA/PPARD/PPARG/PPARGC1A/RARA/RORB/RXRA/RXRB/SRF/TAF1/THRA/THRB/VDR	31
GO:0006352	DNA-templated transcription, initiation	32/83	228/16672	5.69196e-36	AR/CDK8/ESR1/ESR2/ESRRA/ESRRB/ESRRG/HNF4A/JUN/KAT2B/NR0B1/NR1H2/NR1H3/NR2C1/NR3C1/NR3C2/NR5A1/NR5A2/POLR2A/PPARA/PPARD/PPARG/PPARGC1A/RARA/RORB/RXRA/RXRB/SRF/TAF1/THRA/THRB/VDR	32
GO:0048545	response to steroid hormone	36/83	369/16672	2.94092e-35	AR/BRCA1/CARM1/CD38/DNMT3B/EP300/ESR1/ESR2/ESRRA/ESRRB/ESRRG/HDAC1/HNF4A/NR0B1/NR1H2/NR1H3/NR2C1/NR3C1/NR3C2/NR5A1/NR5A2/NRIP1/PPARA/PPARD/PPARG/PPARGC1A/RARA/REST/RORB/RXRA/RXRB/THRA/THRB/VDR/YWHAH/ZNF366	36
GO:0071396	cellular response to lipid	38/83	490/16672	9.411e-34	AR/BRCA1/CARM1/DNMT3B/E2F1/EP300/ESR1/ESR2/ESRRA/ESRRB/ESRRG/HDAC1/HDAC2/HDAC5/HNF4A/NR0B1/NR1H2/NR1H3/NR2C1/NR3C1/NR3C2/NR5A1/NR5A2/NRIP1/PPARA/PPARD/PPARG/PPARGC1A/RARA/REST/RORB/RXRA/RXRB/THRA/THRB/VDR/YWHAH/ZNF366	38
GO:0071407	cellular response to organic cyclic compound	38/83	498/16672	1.55196e-33	APP/AR/BRCA1/CARM1/DNMT3B/EP300/ESR1/ESR2/ESRRA/ESRRB/ESRRG/HDAC1/HDAC2/HNF4A/NR0B1/NR1H2/NR1H3/NR2C1/NR3C1/NR3C2/NR5A1/NR5A2/NRIP1/PPARA/PPARD/PPARG/PPARGC1A/RARA/REST/RORB/RXRA/RXRB/STAT3/THRA/THRB/VDR/YWHAH/ZNF366	38
GO:0030518	intracellular steroid hormone receptor signaling pathway	13/83	123/16672	9.2729e-12	AR/BRCA1/CARM1/EP300/ESR1/ESR2/HDAC1/NR0B1/NR3C1/NRIP1/PPARGC1A/YWHAH/ZNF366	13
GO:0016570	histone modification	17/83	429/16672	6.86803e-09	BRCA1/CARM1/CTBP1/DNMT1/DNMT3B/EP300/HDAC1/HDAC2/HDAC3/HDAC5/KAT2B/MAP3K7/PHF8/PPARGC1A/PRMT1/REST/TAF1	17
GO:0048511	rhythmic process	15/83	310/16672	6.86803e-09	AHR/EP300/ESR1/HDAC1/HDAC2/HDAC3/JUN/KAT2B/NR1H3/NR5A1/NRIP1/PPARA/PPARG/PPARGC1A/RORB	15
GO:0048384	retinoic acid receptor signaling pathway	7/83	31/16672	2.9026e-08	CTBP2/ESRRG/NR1H2/NR2C1/RARA/RXRA/RXRB	7
GO:0007623	circadian rhythm	12/83	190/16672	3.12273e-08	AHR/EP300/HDAC1/HDAC2/HDAC3/JUN/NR1H3/NRIP1/PPARA/PPARG/PPARGC1A/RORB	12
GO:0032355	response to estradiol	10/83	116/16672	5.12642e-08	CD38/CD4/DNMT3A/DNMT3B/ESR1/ESRRA/NRIP1/PPARGC1A/RARA/STAT3	10
GO:0051090	regulation of sequence-specific DNA binding transcription factor activity	14/83	362/16672	4.53065e-07	AR/CIB1/EP300/ESR1/ESR2/HDAC2/HDAC5/JUN/MAP3K7/NR0B1/PPARG/PPARGC1A/SRF/TRAF2	14
GO:0070482	response to oxygen levels	13/83	301/16672	4.53065e-07	CBL/CD38/DNMT3A/DNMT3B/E2F1/EP300/HDAC1/HDAC2/PPARA/PPARD/PPARG/PPARGC1A/SRF	13
GO:0040029	regulation of gene expression, epigenetic	12/83	256/16672	7.34226e-07	BRCA1/DNMT1/DNMT3A/DNMT3B/EP300/ESR1/HDAC1/HDAC2/HDAC5/KAT2B/PHF8/STAT3	12
GO:0010887	negative regulation of cholesterol storage	4/83	6/16672	1.20757e-06	NR1H2/NR1H3/PPARA/PPARG	4
GO:0031000	response to caffeine	5/83	16/16672	1.45553e-06	DNMT3B/HDAC1/HDAC2/PPARG/PPARGC1A	5
GO:0033189	response to vitamin A	5/83	16/16672	1.45553e-06	DNMT3A/DNMT3B/PPARD/PPARG/RARA	5
GO:0051091	positive regulation of sequence-specific DNA binding transcription factor activity	11/83	228/16672	2.05137e-06	AR/CIB1/EP300/ESR1/ESR2/HDAC5/MAP3K7/PPARG/PPARGC1A/SRF/TRAF2	11
GO:0033143	regulation of intracellular steroid hormone receptor signaling pathway	7/83	61/16672	2.41436e-06	AR/BRCA1/CARM1/EP300/HDAC1/NR0B1/ZNF366	7
GO:0010869	regulation of receptor biosynthetic process	5/83	20/16672	4.45048e-06	HDAC1/HDAC2/NR1H3/PPARA/PPARG	5
GO:0031667	response to nutrient levels	13/83	390/16672	6.67804e-06	CBL/CD3E/CD4/DNMT3A/DNMT3B/JUN/PPARA/PPARD/PPARG/PPARGC1A/RARA/SRF/VDR	13
GO:0001101	response to acid chemical	11/83	264/16672	7.60656e-06	CD38/CD9/DNMT1/DNMT3A/E2F1/HDAC2/PPARG/PPARGC1A/RARA/RORB/RXRA	11
GO:0042493	response to drug	13/83	397/16672	7.60656e-06	CD38/DNMT3A/DNMT3B/HDAC1/HDAC2/HDAC5/JUN/LCK/PPARG/PPARGC1A/REST/STAT3/XPO1	13
GO:0018394	peptidyl-lysine acetylation	9/83	157/16672	8.08906e-06	BRCA1/CTBP1/EP300/HDAC1/HDAC2/KAT2B/MAP3K7/PPARGC1A/TAF1	9
GO:0032800	receptor biosynthetic process	5/83	24/16672	9.85461e-06	HDAC1/HDAC2/NR1H3/PPARA/PPARG	5
GO:0019216	regulation of lipid metabolic process	11/83	274/16672	9.85461e-06	BRCA1/HNF4A/NR1H2/NR1H3/NR5A1/PPARA/PPARG/PPARGC1A/REST/THRA/VDR	11
GO:0030520	intracellular estrogen receptor signaling pathway	6/83	48/16672	1.14208e-05	AR/BRCA1/CARM1/ESR1/ESR2/ZNF366	6
GO:0007584	response to nutrient	9/83	166/16672	1.14208e-05	CD3E/CD4/DNMT3A/DNMT3B/PPARD/PPARG/RARA/SRF/VDR	9
GO:0009991	response to extracellular stimulus	13/83	420/16672	1.19454e-05	CBL/CD3E/CD4/DNMT3A/DNMT3B/JUN/PPARA/PPARD/PPARG/PPARGC1A/RARA/SRF/VDR	13
GO:0051098	regulation of binding	11/83	290/16672	1.50257e-05	APP/CARM1/CTBP2/E2F1/EP300/HDAC2/HDAC5/JUN/PPARA/RARA/TRAF2	11
GO:0033273	response to vitamin	7/83	84/16672	1.50257e-05	CD4/DNMT3A/DNMT3B/PPARD/PPARG/RARA/VDR	7
GO:1902893	regulation of pri-miRNA transcription from RNA polymerase II promoter	5/83	27/16672	1.50328e-05	JUN/PPARA/PPARD/SRF/STAT3	5
GO:0043279	response to alkaloid	8/83	126/16672	1.52344e-05	DNMT3A/DNMT3B/HDAC1/HDAC2/HDAC5/PPARA/PPARG/PPARGC1A	8
GO:0051817	modification of morphology or physiology of other organism involved in symbiotic interaction	7/83	88/16672	1.90899e-05	CD4/EP300/HDAC1/JUN/KPNB1/REST/RXRA	7
GO:0061614	pri-miRNA transcription from RNA polymerase II promoter	5/83	29/16672	2.02538e-05	JUN/PPARA/PPARD/SRF/STAT3	5
GO:0006473	protein acetylation	9/83	183/16672	2.09554e-05	BRCA1/CTBP1/EP300/HDAC1/HDAC2/KAT2B/MAP3K7/PPARGC1A/TAF1	9
GO:0045923	positive regulation of fatty acid metabolic process	5/83	30/16672	2.30289e-05	NR1H2/NR1H3/PPARA/PPARG/PPARGC1A	5
GO:0032922	circadian regulation of gene expression	6/83	57/16672	2.31516e-05	AHR/HDAC1/HDAC2/NRIP1/PPARA/PPARGC1A	6
GO:0006476	protein deacetylation	7/83	93/16672	2.31516e-05	CTBP1/EP300/HDAC1/HDAC2/HDAC3/HDAC5/REST	7
GO:0010745	negative regulation of macrophage derived foam cell differentiation	4/83	13/16672	2.31516e-05	NR1H2/NR1H3/PPARA/PPARG	4
GO:0010885	regulation of cholesterol storage	4/83	13/16672	2.31516e-05	NR1H2/NR1H3/PPARA/PPARG	4
GO:0061029	eyelid development in camera-type eye	4/83	13/16672	2.31516e-05	HDAC1/HDAC2/JUN/SRF	4
GO:0014074	response to purine-containing compound	8/83	143/16672	3.16447e-05	APP/CARM1/DNMT3B/HDAC1/HDAC2/JUN/PPARG/PPARGC1A	8
GO:0035601	protein deacylation	7/83	98/16672	3.16447e-05	CTBP1/EP300/HDAC1/HDAC2/HDAC3/HDAC5/REST	7
GO:0018205	peptidyl-lysine modification	12/83	397/16672	3.19332e-05	BRCA1/CTBP1/DNMT1/DNMT3B/EP300/HDAC1/HDAC2/KAT2B/MAP3K7/PPARGC1A/RAD21/TAF1	12
GO:0098732	macromolecule deacylation	7/83	99/16672	3.19332e-05	CTBP1/EP300/HDAC1/HDAC2/HDAC3/HDAC5/REST	7
GO:0045444	fat cell differentiation	9/83	198/16672	3.19332e-05	CARM1/CCDC85B/CTBP1/CTBP2/E2F1/EP300/PPARD/PPARG/PPARGC1A	9
GO:0030521	androgen receptor signaling pathway	6/83	62/16672	3.23689e-05	AR/BRCA1/EP300/HDAC1/NRIP1/PPARGC1A	6
GO:0010742	macrophage derived foam cell differentiation	5/83	34/16672	3.36123e-05	EP300/NR1H2/NR1H3/PPARA/PPARG	5
GO:0090077	foam cell differentiation	5/83	34/16672	3.36123e-05	EP300/NR1H2/NR1H3/PPARA/PPARG	5
GO:0071453	cellular response to oxygen levels	8/83	148/16672	3.51871e-05	CBL/DNMT3A/DNMT3B/E2F1/EP300/PPARD/PPARG/PPARGC1A	8
GO:0050870	positive regulation of T cell activation	9/83	203/16672	3.53993e-05	CD247/CD3E/CD4/LCK/MAP3K7/RARA/TNFRSF14/TRAF2/ZAP70	9
GO:0010878	cholesterol storage	4/83	15/16672	3.53993e-05	NR1H2/NR1H3/PPARA/PPARG	4
GO:1990090	cellular response to nerve growth factor stimulus	5/83	35/16672	3.63678e-05	APP/ARPC3/CBL/CIB1/E2F1	5
GO:0002764	immune response-regulating signaling pathway	13/83	490/16672	3.85744e-05	ARPC3/CD247/CD38/CD3E/CD4/EP300/ESR1/FCGR3A/JUN/LCK/MAP3K7/NR1H3/ZAP70	13
GO:0008202	steroid metabolic process	10/83	273/16672	4.49321e-05	APP/NR0B1/NR5A1/NR5A2/PPARD/PPARGC1A/REST/RXRA/VDR/YWHAH	10
GO:1903039	positive regulation of leukocyte cell-cell adhesion	9/83	211/16672	4.54342e-05	CD247/CD3E/CD4/LCK/MAP3K7/RARA/TNFRSF14/TRAF2/ZAP70	9
GO:0035821	modification of morphology or physiology of other organism	7/83	108/16672	4.72502e-05	CD4/EP300/HDAC1/JUN/KPNB1/REST/RXRA	7
GO:0051251	positive regulation of lymphocyte activation	10/83	276/16672	4.72502e-05	CD247/CD38/CD3E/CD4/LCK/MAP3K7/RARA/TNFRSF14/TRAF2/ZAP70	10
GO:0043543	protein acylation	9/83	214/16672	4.87027e-05	BRCA1/CTBP1/EP300/HDAC1/HDAC2/KAT2B/MAP3K7/PPARGC1A/TAF1	9
GO:0060745	mammary gland branching involved in pregnancy	3/83	5/16672	4.88407e-05	AR/ESR1/VDR	3
GO:1990089	response to nerve growth factor	5/83	38/16672	4.88407e-05	APP/ARPC3/CBL/CIB1/E2F1	5
GO:0071229	cellular response to acid chemical	8/83	159/16672	4.97141e-05	DNMT1/DNMT3A/E2F1/HDAC2/PPARG/PPARGC1A/RARA/RORB	8
GO:0010888	negative regulation of lipid storage	4/83	17/16672	5.13463e-05	NR1H2/NR1H3/PPARA/PPARG	4
GO:0036293	response to decreased oxygen levels	10/83	285/16672	5.76586e-05	CBL/CD38/DNMT3A/DNMT3B/E2F1/EP300/PPARA/PPARD/PPARGC1A/SRF	10
GO:2000757	negative regulation of peptidyl-lysine acetylation	4/83	18/16672	6.38877e-05	BRCA1/CTBP1/HDAC1/HDAC2	4
GO:0002768	immune response-regulating cell surface receptor signaling pathway	11/83	361/16672	6.41524e-05	ARPC3/CD247/CD38/CD3E/CD4/EP300/FCGR3A/JUN/LCK/MAP3K7/ZAP70	11
GO:0043627	response to estrogen	6/83	74/16672	6.71779e-05	BRCA1/EP300/ESR1/PPARG/RARA/ZNF366	6
GO:0019058	viral life cycle	12/83	444/16672	7.09569e-05	CD4/CTBP1/CTBP2/EP300/HDAC1/JUN/KPNB1/NR5A2/POLR2A/REST/TNFRSF14/XPO1	12
GO:0002694	regulation of leukocyte activation	12/83	449/16672	7.86159e-05	AHR/CD247/CD38/CD3E/CD4/LCK/MAP3K7/NR1H3/RARA/TNFRSF14/TRAF2/ZAP70	12
GO:0002696	positive regulation of leukocyte activation	10/83	300/16672	8.40987e-05	CD247/CD38/CD3E/CD4/LCK/MAP3K7/RARA/TNFRSF14/TRAF2/ZAP70	10
GO:0019217	regulation of fatty acid metabolic process	6/83	78/16672	8.67578e-05	BRCA1/NR1H2/NR1H3/PPARA/PPARG/PPARGC1A	6
GO:1905268	negative regulation of chromatin organization	5/83	44/16672	8.67578e-05	BRCA1/CTBP1/DNMT1/DNMT3B/PHF8	5
GO:1903037	regulation of leukocyte cell-cell adhesion	10/83	303/16672	8.67578e-05	CD247/CD3E/CD4/LCK/MAP3K7/PPARA/RARA/TNFRSF14/TRAF2/ZAP70	10
GO:0002757	immune response-activating signal transduction	12/83	457/16672	8.67578e-05	ARPC3/CD247/CD38/CD3E/CD4/EP300/ESR1/FCGR3A/LCK/MAP3K7/NR1H3/ZAP70	12
GO:0036296	response to increased oxygen levels	4/83	20/16672	8.67578e-05	DNMT3B/HDAC1/HDAC2/PPARG	4
GO:0055093	response to hyperoxia	4/83	20/16672	8.67578e-05	DNMT3B/HDAC1/HDAC2/PPARG	4
GO:0022409	positive regulation of cell-cell adhesion	9/83	239/16672	9.41238e-05	CD247/CD3E/CD4/LCK/MAP3K7/RARA/TNFRSF14/TRAF2/ZAP70	9
GO:0071417	cellular response to organonitrogen compound	12/83	462/16672	9.41238e-05	ACTN2/APP/BRCA1/DNMT1/DNMT3A/ESRRA/HDAC2/HDAC5/KAT2B/PPARG/PPARGC1A/STAT3	12
GO:0050867	positive regulation of cell activation	10/83	309/16672	9.75242e-05	CD247/CD38/CD3E/CD4/LCK/MAP3K7/RARA/TNFRSF14/TRAF2/ZAP70	10
GO:0046890	regulation of lipid biosynthetic process	7/83	126/16672	9.75242e-05	BRCA1/NR1H2/NR1H3/NR5A1/PPARGC1A/REST/VDR	7
GO:0070932	histone H3 deacetylation	4/83	21/16672	9.94025e-05	HDAC1/HDAC2/HDAC3/HDAC5	4
GO:1901984	negative regulation of protein acetylation	4/83	21/16672	9.94025e-05	BRCA1/CTBP1/HDAC1/HDAC2	4
GO:0016575	histone deacetylation	6/83	82/16672	0.000100654	CTBP1/HDAC1/HDAC2/HDAC3/HDAC5/REST	6
GO:0016458	gene silencing	9/83	248/16672	0.000117946	DNMT1/DNMT3A/ESR1/HDAC1/HDAC2/HDAC5/PHF8/POLR2A/STAT3	9
GO:0045814	negative regulation of gene expression, epigenetic	7/83	131/16672	0.00011934	DNMT1/DNMT3A/DNMT3B/HDAC1/HDAC2/HDAC5/PHF8	7
GO:0051249	regulation of lymphocyte activation	11/83	396/16672	0.000122065	AHR/CD247/CD38/CD3E/CD4/LCK/MAP3K7/RARA/TNFRSF14/TRAF2/ZAP70	11
GO:0050792	regulation of viral process	9/83	252/16672	0.000129742	CD247/CD4/EP300/HDAC1/JUN/LCK/NR5A2/POLR2A/REST	9
GO:0050865	regulation of cell activation	12/83	482/16672	0.000129742	AHR/CD247/CD38/CD3E/CD4/LCK/MAP3K7/NR1H3/RARA/TNFRSF14/TRAF2/ZAP70	12
GO:0043921	modulation by host of viral transcription	4/83	23/16672	0.000133667	EP300/HDAC1/JUN/REST	4
GO:0052472	modulation by host of symbiont transcription	4/83	23/16672	0.000133667	EP300/HDAC1/JUN/REST	4
GO:0048608	reproductive structure development	11/83	406/16672	0.000146762	AR/ESR1/NR0B1/NR5A1/NRIP1/PPARD/PPARG/RARA/RXRA/TEX11/VDR	11
GO:0002429	immune response-activating cell surface receptor signaling pathway	10/83	329/16672	0.000147621	ARPC3/CD247/CD38/CD3E/CD4/EP300/FCGR3A/LCK/MAP3K7/ZAP70	10
GO:0052312	modulation of transcription in other organism involved in symbiotic interaction	4/83	24/16672	0.000154902	EP300/HDAC1/JUN/REST	4
GO:0061458	reproductive system development	11/83	410/16672	0.00015621	AR/ESR1/NR0B1/NR5A1/NRIP1/PPARD/PPARG/RARA/RXRA/TEX11/VDR	11
GO:2000756	regulation of peptidyl-lysine acetylation	5/83	53/16672	0.000173826	BRCA1/CTBP1/HDAC1/HDAC2/PPARGC1A	5
GO:0016573	histone acetylation	7/83	146/16672	0.000217603	BRCA1/CTBP1/EP300/KAT2B/MAP3K7/PPARGC1A/TAF1	7
GO:0043903	regulation of symbiosis, encompassing mutualism through parasitism	9/83	274/16672	0.000230645	CD247/CD4/EP300/HDAC1/JUN/LCK/NR5A2/POLR2A/REST	9
GO:0060135	maternal process involved in female pregnancy	5/83	57/16672	0.000242433	AR/ESR1/PPARD/RXRA/VDR	5
GO:0001666	response to hypoxia	9/83	277/16672	0.000246717	CD38/DNMT3A/DNMT3B/E2F1/EP300/PPARA/PPARD/PPARGC1A/SRF	9
GO:0051573	negative regulation of histone H3-K9 methylation	3/83	9/16672	0.000246717	BRCA1/DNMT1/DNMT3B	3
GO:0070933	histone H4 deacetylation	3/83	9/16672	0.000246717	HDAC1/HDAC2/REST	3
GO:1902894	negative regulation of pri-miRNA transcription from RNA polymerase II promoter	3/83	9/16672	0.000246717	PPARA/PPARD/SRF	3
GO:0010565	regulation of cellular ketone metabolic process	7/83	151/16672	0.000251417	BRCA1/NR1H2/NR1H3/PPARA/PPARG/PPARGC1A/REST	7
GO:0018393	internal peptidyl-lysine acetylation	7/83	151/16672	0.000251417	BRCA1/CTBP1/EP300/KAT2B/MAP3K7/PPARGC1A/TAF1	7
GO:0018108	peptidyl-tyrosine phosphorylation	10/83	356/16672	0.000259771	APP/CBL/CD3E/CD4/HDAC1/HDAC2/LCK/STAT3/TNFRSF14/ZAP70	10
GO:0018212	peptidyl-tyrosine modification	10/83	358/16672	0.000269111	APP/CBL/CD3E/CD4/HDAC1/HDAC2/LCK/STAT3/TNFRSF14/ZAP70	10
GO:0050730	regulation of peptidyl-tyrosine phosphorylation	8/83	214/16672	0.000269111	APP/CBL/CD3E/CD4/HDAC1/HDAC2/STAT3/TNFRSF14	8
GO:0032526	response to retinoic acid	6/83	102/16672	0.000278498	CD38/HDAC2/PPARG/RARA/RORB/RXRA	6
GO:0014823	response to activity	5/83	60/16672	0.000279934	CBL/DNMT3B/HDAC5/PPARD/PPARGC1A	5
GO:1901983	regulation of protein acetylation	5/83	60/16672	0.000279934	BRCA1/CTBP1/HDAC1/HDAC2/PPARGC1A	5
GO:0010743	regulation of macrophage derived foam cell differentiation	4/83	29/16672	0.000287017	NR1H2/NR1H3/PPARA/PPARG	4
GO:0043900	regulation of multi-organism process	10/83	363/16672	0.000289225	CD247/CD4/CIB1/EP300/HDAC1/JUN/LCK/NR5A2/POLR2A/REST	10
GO:0006475	internal protein amino acid acetylation	7/83	157/16672	0.000299486	BRCA1/CTBP1/EP300/KAT2B/MAP3K7/PPARGC1A/TAF1	7
GO:0050863	regulation of T cell activation	9/83	289/16672	0.000302822	CD247/CD3E/CD4/LCK/MAP3K7/RARA/TNFRSF14/TRAF2/ZAP70	9
GO:0032743	positive regulation of interleukin-2 production	4/83	30/16672	0.000313696	CD3E/CD4/MAP3K7/TRAF2	4
GO:0033144	negative regulation of intracellular steroid hormone receptor signaling pathway	4/83	30/16672	0.000313696	BRCA1/HDAC1/NR0B1/ZNF366	4
GO:0033146	regulation of intracellular estrogen receptor signaling pathway	4/83	30/16672	0.000313696	AR/BRCA1/CARM1/ZNF366	4
GO:0002521	leukocyte differentiation	11/83	454/16672	0.000327774	CD3E/CD4/EP300/ESRRA/HDAC5/JUN/LCK/PPARG/RARA/SRF/ZAP70	11
GO:0045785	positive regulation of cell adhesion	10/83	371/16672	0.000329537	CD247/CD3E/CD4/CIB1/LCK/MAP3K7/RARA/TNFRSF14/TRAF2/ZAP70	10
GO:2000142	regulation of DNA-templated transcription, initiation	4/83	31/16672	0.000347461	JUN/SRF/TAF1/THRA	4
GO:0019915	lipid storage	5/83	64/16672	0.000347461	NR1H2/NR1H3/NRIP1/PPARA/PPARG	5
GO:0046782	regulation of viral transcription	5/83	64/16672	0.000347461	EP300/HDAC1/JUN/POLR2A/REST	5
GO:0051235	maintenance of location	9/83	297/16672	0.000347461	CD4/LCK/NR1H2/NR1H3/NR5A1/NRIP1/PPARA/PPARG/THRA	9
GO:0022407	regulation of cell-cell adhesion	10/83	375/16672	0.000347461	CD247/CD3E/CD4/LCK/MAP3K7/PPARA/RARA/TNFRSF14/TRAF2/ZAP70	10
GO:0001819	positive regulation of cytokine production	10/83	376/16672	0.000350995	BRCA1/CD3E/CD4/EP300/HDAC1/HDAC2/MAP3K7/RARA/TNFRSF14/TRAF2	10
GO:0032496	response to lipopolysaccharide	9/83	298/16672	0.000350995	HDAC1/HDAC2/HDAC5/JUN/NR1H3/PPARD/PPARGC1A/RARA/TNFRSF14	9
GO:0010870	positive regulation of receptor biosynthetic process	3/83	11/16672	0.000381351	HDAC1/HDAC2/NR1H3	3
GO:0045820	negative regulation of glycolytic process	3/83	11/16672	0.000381351	PPARA/PPARGC1A/STAT3	3
GO:0051195	negative regulation of cofactor metabolic process	3/83	11/16672	0.000381351	PPARA/PPARGC1A/STAT3	3
GO:0051198	negative regulation of coenzyme metabolic process	3/83	11/16672	0.000381351	PPARA/PPARGC1A/STAT3	3
GO:0006342	chromatin silencing	6/83	115/16672	0.000456005	DNMT1/DNMT3A/HDAC1/HDAC2/HDAC5/PHF8	6
GO:0007159	leukocyte cell-cell adhesion	11/83	476/16672	0.000456005	CD247/CD3E/CD4/LCK/MAP3K7/PPARA/RARA/SRF/TNFRSF14/TRAF2/ZAP70	11
GO:0002237	response to molecule of bacterial origin	9/83	311/16672	0.000466824	HDAC1/HDAC2/HDAC5/JUN/NR1H3/PPARD/PPARGC1A/RARA/TNFRSF14	9
GO:0043922	negative regulation by host of viral transcription	3/83	12/16672	0.000484327	HDAC1/JUN/REST	3
GO:0045722	positive regulation of gluconeogenesis	3/83	12/16672	0.000484327	KAT2B/PPARA/PPARGC1A	3
GO:2000188	regulation of cholesterol homeostasis	3/83	12/16672	0.000484327	HNF4A/NR1H2/NR1H3	3
GO:0016049	cell growth	11/83	481/16672	0.000484327	APP/AR/CCDC85B/CD38/CIB1/ESR2/FHL1/HNF4A/PPARD/PPARG/SRF	11
GO:0031057	negative regulation of histone modification	4/83	35/16672	0.00050174	BRCA1/CTBP1/DNMT1/DNMT3B	4
GO:0007565	female pregnancy	7/83	178/16672	0.000552328	AR/CD38/ESR1/PPARD/RARA/RXRA/VDR	7
GO:0048732	gland development	10/83	406/16672	0.000606822	AR/ESR1/JUN/NR0B1/NR5A1/RARA/RXRA/SRF/THRA/VDR	10
GO:0050872	white fat cell differentiation	3/83	13/16672	0.000606822	CTBP1/CTBP2/PPARG	3
GO:0001654	eye development	9/83	328/16672	0.000664875	HDAC1/HDAC2/JUN/RARA/RORB/RXRA/SRF/STAT3/TULP3	9
GO:0050850	positive regulation of calcium-mediated signaling	4/83	38/16672	0.000671184	CD3E/CD4/CIB1/ZAP70	4
GO:0061647	histone H3-K9 modification	4/83	38/16672	0.000671184	BRCA1/DNMT1/DNMT3B/KAT2B	4
GO:0051961	negative regulation of nervous system development	8/83	254/16672	0.000684006	APP/CARM1/CIB1/HDAC2/REST/STAT3/TULP3/YWHAH	8
GO:0072331	signal transduction by p53 class mediator	8/83	254/16672	0.000684006	BRCA1/CARM1/E2F1/EP300/HDAC1/HDAC2/PRMT1/TAF1	8
GO:0030099	myeloid cell differentiation	9/83	331/16672	0.000690253	CIB1/EP300/ESRRA/JUN/PPARG/PRMT1/RARA/SRF/THRA	9
GO:0046321	positive regulation of fatty acid oxidation	3/83	14/16672	0.000734336	PPARA/PPARG/PPARGC1A	3
GO:0031058	positive regulation of histone modification	5/83	78/16672	0.00075337	BRCA1/CTBP1/DNMT1/DNMT3B/PPARGC1A	5
GO:0031295	T cell costimulation	5/83	79/16672	0.000795983	CD247/CD3E/CD4/LCK/TNFRSF14	5
GO:0031294	lymphocyte costimulation	5/83	80/16672	0.000840331	CD247/CD3E/CD4/LCK/TNFRSF14	5
GO:0007548	sex differentiation	8/83	263/16672	0.000841633	AR/ESR1/HNF4A/NR0B1/NR5A1/NRIP1/RARA/TEX11	8
GO:0048714	positive regulation of oligodendrocyte differentiation	3/83	15/16672	0.000885679	HDAC1/HDAC2/PPARG	3
GO:0008584	male gonad development	6/83	133/16672	0.000886037	AR/ESR1/NR0B1/NR5A1/RARA/TEX11	6
GO:0046546	development of primary male sexual characteristics	6/83	133/16672	0.000886037	AR/ESR1/NR0B1/NR5A1/RARA/TEX11	6
GO:0071158	positive regulation of cell cycle arrest	5/83	82/16672	0.000916366	BRCA1/CARM1/E2F1/EP300/PRMT1	5
GO:0010883	regulation of lipid storage	4/83	42/16672	0.000916366	NR1H2/NR1H3/PPARA/PPARG	4
GO:0045058	T cell selection	4/83	42/16672	0.000916366	CD3E/CD4/SRF/ZAP70	4
GO:0042110	T cell activation	10/83	436/16672	0.000976234	CD247/CD3E/CD4/LCK/MAP3K7/RARA/SRF/TNFRSF14/TRAF2/ZAP70	10
GO:0070489	T cell aggregation	10/83	436/16672	0.000976234	CD247/CD3E/CD4/LCK/MAP3K7/RARA/SRF/TNFRSF14/TRAF2/ZAP70	10
GO:0071593	lymphocyte aggregation	10/83	437/16672	0.000989096	CD247/CD3E/CD4/LCK/MAP3K7/RARA/SRF/TNFRSF14/TRAF2/ZAP70	10
GO:1905269	positive regulation of chromatin organization	5/83	84/16672	0.000992509	BRCA1/CTBP1/DNMT1/DNMT3B/PPARGC1A	5
GO:0031061	negative regulation of histone methylation	3/83	16/16672	0.00101326	BRCA1/DNMT1/DNMT3B	3
GO:0051571	positive regulation of histone H3-K4 methylation	3/83	16/16672	0.00101326	BRCA1/DNMT1/DNMT3B	3
GO:0044706	multi-multicellular organism process	7/83	201/16672	0.00101326	AR/CD38/ESR1/PPARD/RARA/RXRA/VDR	7
GO:0036294	cellular response to decreased oxygen levels	6/83	139/16672	0.00106032	CBL/DNMT3A/E2F1/EP300/PPARD/PPARGC1A	6
GO:0070486	leukocyte aggregation	10/83	444/16672	0.00108976	CD247/CD3E/CD4/LCK/MAP3K7/RARA/SRF/TNFRSF14/TRAF2/ZAP70	10
GO:0042220	response to cocaine	4/83	45/16672	0.00112981	DNMT3A/DNMT3B/HDAC2/HDAC5	4
GO:0043392	negative regulation of DNA binding	4/83	45/16672	0.00112981	E2F1/HDAC2/JUN/PPARA	4
GO:0008406	gonad development	7/83	208/16672	0.00121762	AR/ESR1/NR0B1/NR5A1/NRIP1/RARA/TEX11	7
GO:0030850	prostate gland development	4/83	46/16672	0.00121762	AR/ESR1/RARA/RXRA	4
GO:0070997	neuron death	8/83	282/16672	0.00121762	APP/CBL/HDAC1/JUN/PPARA/PPARGC1A/STAT3/TRAF2	8
GO:0043010	camera-type eye development	8/83	285/16672	0.00130339	HDAC1/HDAC2/JUN/RARA/RORB/RXRA/SRF/TULP3	8
GO:2000134	negative regulation of G1/S transition of mitotic cell cycle	5/83	91/16672	0.0013493	CARM1/E2F1/EP300/FHL1/PRMT1	5
GO:1902275	regulation of chromatin organization	6/83	147/16672	0.0013493	BRCA1/CTBP1/DNMT1/DNMT3B/PHF8/PPARGC1A	6
GO:0045137	development of primary sexual characteristics	7/83	213/16672	0.0013493	AR/ESR1/NR0B1/NR5A1/NRIP1/RARA/TEX11	7
GO:0030220	platelet formation	3/83	18/16672	0.0013493	CIB1/EP300/SRF	3
GO:0045978	negative regulation of nucleoside metabolic process	3/83	18/16672	0.0013493	PPARA/PPARGC1A/STAT3	3
GO:1903579	negative regulation of ATP metabolic process	3/83	18/16672	0.0013493	PPARA/PPARGC1A/STAT3	3
GO:0042180	cellular ketone metabolic process	7/83	215/16672	0.00142063	BRCA1/NR1H2/NR1H3/PPARA/PPARG/PPARGC1A/REST	7
GO:0010952	positive regulation of peptidase activity	6/83	149/16672	0.00143228	APP/LCK/PPARG/REST/STAT3/TRAF2	6
GO:0030219	megakaryocyte differentiation	4/83	49/16672	0.0014725	CIB1/EP300/PRMT1/SRF	4
GO:1902807	negative regulation of cell cycle G1/S phase transition	5/83	94/16672	0.00150783	CARM1/E2F1/EP300/FHL1/PRMT1	5
GO:0050708	regulation of protein secretion	9/83	377/16672	0.00150882	CD38/HDAC1/HNF4A/NR1H2/NR1H3/PPARD/REST/TNFRSF14/TRAF2	9
GO:0036344	platelet morphogenesis	3/83	19/16672	0.00153697	CIB1/EP300/SRF	3
GO:0051570	regulation of histone H3-K9 methylation	3/83	19/16672	0.00153697	BRCA1/DNMT1/DNMT3B	3
GO:0043112	receptor metabolic process	6/83	152/16672	0.00153697	CD9/HDAC1/HDAC2/NR1H3/PPARA/PPARG	6
GO:0097305	response to alcohol	6/83	152/16672	0.00153697	BRCA1/CBL/DNMT3A/HDAC2/RARA/STAT3	6
GO:0032663	regulation of interleukin-2 production	4/83	50/16672	0.00153697	CD3E/CD4/MAP3K7/TRAF2	4
GO:0001558	regulation of cell growth	9/83	382/16672	0.00161582	CCDC85B/CD38/CIB1/ESR2/FHL1/HNF4A/PPARD/PPARG/SRF	9
GO:0050810	regulation of steroid biosynthetic process	4/83	51/16672	0.00164453	NR5A1/PPARGC1A/REST/VDR	4
GO:0050851	antigen receptor-mediated signaling pathway	7/83	223/16672	0.00167185	CD247/CD38/CD3E/CD4/LCK/MAP3K7/ZAP70	7
GO:0046661	male sex differentiation	6/83	155/16672	0.00167185	AR/ESR1/NR0B1/NR5A1/RARA/TEX11	6
GO:0045061	thymic T cell selection	3/83	20/16672	0.00170477	CD3E/SRF/ZAP70	3
GO:0046640	regulation of alpha-beta T cell proliferation	3/83	20/16672	0.00170477	CD3E/TNFRSF14/ZAP70	3
GO:0060334	regulation of interferon-gamma-mediated signaling pathway	3/83	20/16672	0.00170477	NR1H2/NR1H3/PPARG	3
GO:1902895	positive regulation of pri-miRNA transcription from RNA polymerase II promoter	3/83	20/16672	0.00170477	JUN/SRF/STAT3	3
GO:0042752	regulation of circadian rhythm	5/83	99/16672	0.00178453	NR1H3/PPARA/PPARG/PPARGC1A/RORB	5
GO:0051851	modification by host of symbiont morphology or physiology	4/83	53/16672	0.0018375	EP300/HDAC1/JUN/REST	4
GO:0030098	lymphocyte differentiation	8/83	306/16672	0.00185012	CD3E/CD4/EP300/HDAC5/LCK/RARA/SRF/ZAP70	8
GO:0006346	methylation-dependent chromatin silencing	3/83	21/16672	0.0019246	DNMT1/DNMT3A/HDAC1	3
GO:0007617	mating behavior	3/83	21/16672	0.0019246	APP/THRA/THRB	3
GO:0060330	regulation of response to interferon-gamma	3/83	21/16672	0.0019246	NR1H2/NR1H3/PPARG	3
GO:0061448	connective tissue development	7/83	231/16672	0.00196351	CARM1/ESRRA/PPARD/PPARGC1A/RARA/SRF/THRA	7
GO:0002697	regulation of immune effector process	8/83	310/16672	0.00197433	CD247/CD4/LCK/MAP3K7/RARA/TNFRSF14/TRAF2/ZAP70	8
GO:0050731	positive regulation of peptidyl-tyrosine phosphorylation	6/83	162/16672	0.00199776	CD3E/CD4/HDAC1/HDAC2/STAT3/TNFRSF14	6
GO:0051702	interaction with symbiont	4/83	55/16672	0.00203999	EP300/HDAC1/JUN/REST	4
GO:0030308	negative regulation of cell growth	6/83	163/16672	0.00203999	CCDC85B/ESR2/FHL1/HNF4A/PPARD/PPARG	6
GO:0071156	regulation of cell cycle arrest	5/83	103/16672	0.00203999	BRCA1/CARM1/E2F1/EP300/PRMT1	5
GO:0007507	heart development	10/83	493/16672	0.00206045	ACTN2/EP300/JUN/PPARA/PPARD/PPARG/RARA/REST/RXRA/SRF	10
GO:0050768	negative regulation of neurogenesis	7/83	235/16672	0.00210958	APP/CARM1/CIB1/HDAC2/REST/STAT3/YWHAH	7
GO:0050878	regulation of body fluid levels	10/83	495/16672	0.00210958	CD9/HDAC1/HDAC2/HNF4A/LCK/NR1H2/NR1H3/SRF/VDR/ZAP70	10
GO:0060968	regulation of gene silencing	4/83	56/16672	0.00213246	DNMT1/ESR1/PHF8/STAT3	4
GO:0030330	DNA damage response, signal transduction by p53 class mediator	5/83	105/16672	0.00218179	BRCA1/CARM1/E2F1/EP300/PRMT1	5
GO:0006909	phagocytosis	7/83	238/16672	0.00224175	ARPC3/CD247/FCGR3A/NR1H3/PECAM1/PPARG/RARA	7
GO:0050852	T cell receptor signaling pathway	6/83	167/16672	0.00224359	CD247/CD3E/CD4/LCK/MAP3K7/ZAP70	6
GO:0032623	interleukin-2 production	4/83	57/16672	0.00224359	CD3E/CD4/MAP3K7/TRAF2	4
GO:0043393	regulation of protein binding	6/83	168/16672	0.00230397	APP/CARM1/EP300/HDAC5/PPARA/TRAF2	6
GO:0007530	sex determination	3/83	23/16672	0.00234176	AR/NR0B1/NR5A1	3
GO:0060260	regulation of transcription initiation from RNA polymerase II promoter	3/83	23/16672	0.00234176	SRF/TAF1/THRA	3
GO:0060444	branching involved in mammary gland duct morphogenesis	3/83	23/16672	0.00234176	AR/ESR1/VDR	3
GO:0045598	regulation of fat cell differentiation	5/83	108/16672	0.00240176	CARM1/CCDC85B/E2F1/PPARD/PPARG	5
GO:1901215	negative regulation of neuron death	6/83	170/16672	0.00240284	HDAC1/JUN/PPARA/PPARGC1A/STAT3/TRAF2	6
GO:1903900	regulation of viral life cycle	6/83	171/16672	0.00246959	EP300/HDAC1/JUN/NR5A2/POLR2A/REST	6
GO:0006359	regulation of transcription from RNA polymerase III promoter	3/83	24/16672	0.00258658	AR/BRCA1/ZNF143	3
GO:0032897	negative regulation of viral transcription	3/83	24/16672	0.00258658	HDAC1/JUN/REST	3
GO:0046633	alpha-beta T cell proliferation	3/83	24/16672	0.00258658	CD3E/TNFRSF14/ZAP70	3
GO:2000144	positive regulation of DNA-templated transcription, initiation	3/83	24/16672	0.00258658	JUN/SRF/TAF1	3
GO:0006977	DNA damage response, signal transduction by p53 class mediator resulting in cell cycle arrest	4/83	60/16672	0.00259805	CARM1/E2F1/EP300/PRMT1	4
GO:0006305	DNA alkylation	4/83	61/16672	0.00269348	BRCA1/DNMT1/DNMT3A/DNMT3B	4
GO:0006306	DNA methylation	4/83	61/16672	0.00269348	BRCA1/DNMT1/DNMT3A/DNMT3B	4
GO:0072431	signal transduction involved in mitotic G1 DNA damage checkpoint	4/83	61/16672	0.00269348	CARM1/E2F1/EP300/PRMT1	4
GO:1902400	intracellular signal transduction involved in G1 DNA damage checkpoint	4/83	61/16672	0.00269348	CARM1/E2F1/EP300/PRMT1	4
GO:0010891	negative regulation of sequestering of triglyceride	2/83	5/16672	0.00269348	PPARA/PPARG	2
GO:0048550	negative regulation of pinocytosis	2/83	5/16672	0.00269348	NR1H2/NR1H3	2
GO:0060509	Type I pneumocyte differentiation	2/83	5/16672	0.00269348	THRA/THRB	2
GO:0061197	fungiform papilla morphogenesis	2/83	5/16672	0.00269348	HDAC1/HDAC2	2
GO:2001171	positive regulation of ATP biosynthetic process	2/83	5/16672	0.00269348	PPARGC1A/STAT3	2
GO:0035051	cardiocyte differentiation	5/83	113/16672	0.00275957	ACTN2/RARA/REST/RXRA/SRF	5
GO:2000171	negative regulation of dendrite development	3/83	25/16672	0.00278325	CARM1/HDAC2/YWHAH	3
GO:0072413	signal transduction involved in mitotic cell cycle checkpoint	4/83	62/16672	0.00278325	CARM1/E2F1/EP300/PRMT1	4
GO:1902402	signal transduction involved in mitotic DNA damage checkpoint	4/83	62/16672	0.00278325	CARM1/E2F1/EP300/PRMT1	4
GO:1902403	signal transduction involved in mitotic DNA integrity checkpoint	4/83	62/16672	0.00278325	CARM1/E2F1/EP300/PRMT1	4
GO:0046902	regulation of mitochondrial membrane permeability	4/83	63/16672	0.00294886	E2F1/STAT3/YWHAH/YWHAQ	4
GO:0060740	prostate gland epithelium morphogenesis	3/83	26/16672	0.00307458	AR/ESR1/RXRA	3
GO:0072401	signal transduction involved in DNA integrity checkpoint	4/83	64/16672	0.00309629	CARM1/E2F1/EP300/PRMT1	4
GO:0072422	signal transduction involved in DNA damage checkpoint	4/83	64/16672	0.00309629	CARM1/E2F1/EP300/PRMT1	4
GO:0032844	regulation of homeostatic process	9/83	433/16672	0.00317003	CD38/CD4/FHL1/HNF4A/LCK/NR1H2/NR1H3/PPARGC1A/PRMT1	9
GO:0072395	signal transduction involved in cell cycle checkpoint	4/83	65/16672	0.00326102	CARM1/E2F1/EP300/PRMT1	4
GO:0042692	muscle cell differentiation	8/83	344/16672	0.00329219	ACTN2/HDAC5/PPARD/RARA/REST/RXRA/SRF/THRA	8
GO:0042770	signal transduction in response to DNA damage	5/83	119/16672	0.00332287	BRCA1/CARM1/E2F1/EP300/PRMT1	5
GO:0045471	response to ethanol	5/83	119/16672	0.00332287	CBL/DNMT3A/HDAC2/RARA/STAT3	5
GO:0051569	regulation of histone H3-K4 methylation	3/83	27/16672	0.00332287	BRCA1/DNMT1/DNMT3B	3
GO:0045665	negative regulation of neuron differentiation	6/83	185/16672	0.00332287	APP/CARM1/CIB1/HDAC2/REST/YWHAH	6
GO:0050670	regulation of lymphocyte proliferation	6/83	185/16672	0.00332287	AHR/CD38/CD3E/CD4/TNFRSF14/ZAP70	6
GO:0032944	regulation of mononuclear cell proliferation	6/83	186/16672	0.00340702	AHR/CD38/CD3E/CD4/TNFRSF14/ZAP70	6
GO:2000241	regulation of reproductive process	5/83	121/16672	0.00350936	AR/CIB1/ESR1/NR5A1/RXRA	5
GO:0045862	positive regulation of proteolysis	8/83	349/16672	0.00350936	APP/HDAC2/LCK/PPARG/REST/STAT3/TAF1/TRAF2	8
GO:0090559	regulation of membrane permeability	4/83	67/16672	0.00350936	E2F1/STAT3/YWHAH/YWHAQ	4
GO:0045834	positive regulation of lipid metabolic process	5/83	122/16672	0.00350936	NR1H2/NR1H3/PPARA/PPARG/PPARGC1A	5
GO:0034504	protein localization to nucleus	8/83	351/16672	0.00350936	CSE1L/HDAC3/JUN/KPNB1/NR5A1/STAT3/THRA/XPO1	8
GO:0019098	reproductive behavior	3/83	28/16672	0.00350936	APP/THRA/THRB	3
GO:0032965	regulation of collagen biosynthetic process	3/83	28/16672	0.00350936	HDAC2/PPARD/PPARG	3
GO:0046320	regulation of fatty acid oxidation	3/83	28/16672	0.00350936	PPARA/PPARG/PPARGC1A	3
GO:0050690	regulation of defense response to virus by virus	3/83	28/16672	0.00350936	CD247/CD4/LCK	3
GO:0051567	histone H3-K9 methylation	3/83	28/16672	0.00350936	BRCA1/DNMT1/DNMT3B	3
GO:0060512	prostate gland morphogenesis	3/83	28/16672	0.00350936	AR/ESR1/RXRA	3
GO:1900739	regulation of protein insertion into mitochondrial membrane involved in apoptotic signaling pathway	3/83	28/16672	0.00350936	E2F1/YWHAH/YWHAQ	3
GO:1900740	positive regulation of protein insertion into mitochondrial membrane involved in apoptotic signaling pathway	3/83	28/16672	0.00350936	E2F1/YWHAH/YWHAQ	3
GO:0010871	negative regulation of receptor biosynthetic process	2/83	6/16672	0.00352013	PPARA/PPARG	2
GO:0033299	secretion of lysosomal enzymes	2/83	6/16672	0.00352013	NR1H2/NR1H3	2
GO:0061196	fungiform papilla development	2/83	6/16672	0.00352013	HDAC1/HDAC2	2
GO:2001169	regulation of ATP biosynthetic process	2/83	6/16672	0.00352013	PPARGC1A/STAT3	2
GO:0071300	cellular response to retinoic acid	4/83	68/16672	0.00353089	HDAC2/PPARG/RARA/RORB	4
GO:0055088	lipid homeostasis	5/83	123/16672	0.00356099	HNF4A/NR1H2/NR1H3/NR5A2/PPARG	5
GO:0007568	aging	7/83	268/16672	0.00361166	CARM1/DNMT3A/JUN/NR5A1/PPARGC1A/SRF/STAT3	7
GO:0031056	regulation of histone modification	5/83	124/16672	0.00362998	BRCA1/CTBP1/DNMT1/DNMT3B/PPARGC1A	5
GO:0031571	mitotic G1 DNA damage checkpoint	4/83	69/16672	0.00362998	CARM1/E2F1/EP300/PRMT1	4
GO:0042632	cholesterol homeostasis	4/83	69/16672	0.00362998	HNF4A/NR1H2/NR1H3/NR5A2	4
GO:0044819	mitotic G1/S transition checkpoint	4/83	69/16672	0.00362998	CARM1/E2F1/EP300/PRMT1	4
GO:0046634	regulation of alpha-beta T cell activation	4/83	69/16672	0.00362998	CD3E/RARA/TNFRSF14/ZAP70	4
GO:0055092	sterol homeostasis	4/83	69/16672	0.00362998	HNF4A/NR1H2/NR1H3/NR5A2	4
GO:0001893	maternal placenta development	3/83	29/16672	0.00369783	PPARD/RXRA/VDR	3
GO:0048713	regulation of oligodendrocyte differentiation	3/83	29/16672	0.00369783	HDAC1/HDAC2/PPARG	3
GO:0010721	negative regulation of cell development	7/83	271/16672	0.00374158	APP/CARM1/CIB1/HDAC2/REST/STAT3/YWHAH	7
GO:0044783	G1 DNA damage checkpoint	4/83	70/16672	0.00378277	CARM1/E2F1/EP300/PRMT1	4
GO:0070663	regulation of leukocyte proliferation	6/83	195/16672	0.00391751	AHR/CD38/CD3E/CD4/TNFRSF14/ZAP70	6
GO:0001844	protein insertion into mitochondrial membrane involved in apoptotic signaling pathway	3/83	30/16672	0.00402436	E2F1/YWHAH/YWHAQ	3
GO:0071392	cellular response to estradiol stimulus	3/83	30/16672	0.00402436	ESR1/NRIP1/PPARGC1A	3
GO:0060541	respiratory system development	6/83	197/16672	0.0040934	EP300/RARA/SRF/THRA/THRB/TULP3	6
GO:0009306	protein secretion	9/83	460/16672	0.00421093	CD38/HDAC1/HNF4A/NR1H2/NR1H3/PPARD/REST/TNFRSF14/TRAF2	9
GO:0016571	histone methylation	5/83	130/16672	0.00432842	BRCA1/CARM1/DNMT1/DNMT3B/PRMT1	5
GO:0051204	protein insertion into mitochondrial membrane	3/83	31/16672	0.00433635	E2F1/YWHAH/YWHAQ	3
GO:0060603	mammary gland duct morphogenesis	3/83	31/16672	0.00433635	AR/ESR1/VDR	3
GO:0071867	response to monoamine	3/83	31/16672	0.00433635	APP/HDAC2/PPARGC1A	3
GO:0071869	response to catecholamine	3/83	31/16672	0.00433635	APP/HDAC2/PPARGC1A	3
GO:0019919	peptidyl-arginine methylation, to asymmetrical-dimethyl arginine	2/83	7/16672	0.00443377	CARM1/PRMT1	2
GO:0032966	negative regulation of collagen biosynthetic process	2/83	7/16672	0.00443377	PPARD/PPARG	2
GO:0036295	cellular response to increased oxygen levels	2/83	7/16672	0.00443377	DNMT3B/PPARG	2
GO:0060687	regulation of branching involved in prostate gland morphogenesis	2/83	7/16672	0.00443377	ESR1/RXRA	2
GO:0060789	hair follicle placode formation	2/83	7/16672	0.00443377	HDAC1/HDAC2	2
GO:0071455	cellular response to hyperoxia	2/83	7/16672	0.00443377	DNMT3B/PPARG	2
GO:0090186	regulation of pancreatic juice secretion	2/83	7/16672	0.00443377	NR1H2/NR1H3	2
GO:0051100	negative regulation of binding	5/83	132/16672	0.00444662	CARM1/E2F1/HDAC2/JUN/PPARA	5
GO:2000045	regulation of G1/S transition of mitotic cell cycle	5/83	132/16672	0.00444662	CARM1/E2F1/EP300/FHL1/PRMT1	5
GO:0071456	cellular response to hypoxia	5/83	133/16672	0.00454149	DNMT3A/E2F1/EP300/PPARD/PPARGC1A	5
GO:0019218	regulation of steroid metabolic process	4/83	75/16672	0.00454149	NR5A1/PPARGC1A/REST/VDR	4
GO:0002720	positive regulation of cytokine production involved in immune response	3/83	32/16672	0.00454149	MAP3K7/TNFRSF14/TRAF2	3
GO:0006110	regulation of glycolytic process	3/83	32/16672	0.00454149	PPARA/PPARGC1A/STAT3	3
GO:0031062	positive regulation of histone methylation	3/83	32/16672	0.00454149	BRCA1/DNMT1/DNMT3B	3
GO:0045687	positive regulation of glial cell differentiation	3/83	32/16672	0.00454149	HDAC1/HDAC2/PPARG	3
GO:0044728	DNA methylation or demethylation	4/83	76/16672	0.00473536	BRCA1/DNMT1/DNMT3A/DNMT3B	4
GO:0050848	regulation of calcium-mediated signaling	4/83	76/16672	0.00473536	CD3E/CD4/CIB1/ZAP70	4
GO:0010950	positive regulation of endopeptidase activity	5/83	135/16672	0.00478742	LCK/PPARG/REST/STAT3/TRAF2	5
GO:0030217	T cell differentiation	6/83	207/16672	0.004885	CD3E/CD4/LCK/RARA/SRF/ZAP70	6
GO:0002042	cell migration involved in sprouting angiogenesis	3/83	33/16672	0.004885	CIB1/HDAC5/SRF	3
GO:0010712	regulation of collagen metabolic process	3/83	33/16672	0.004885	HDAC2/PPARD/PPARG	3
GO:0010907	positive regulation of glucose metabolic process	3/83	34/16672	0.00524092	KAT2B/PPARA/PPARGC1A	3
GO:0032964	collagen biosynthetic process	3/83	34/16672	0.00524092	HDAC2/PPARD/PPARG	3
GO:0042304	regulation of fatty acid biosynthetic process	3/83	34/16672	0.00524092	BRCA1/NR1H2/NR1H3	3
GO:0044246	regulation of multicellular organismal metabolic process	3/83	34/16672	0.00524092	HDAC2/PPARD/PPARG	3
GO:0045824	negative regulation of innate immune response	3/83	34/16672	0.00524092	NR1H2/NR1H3/PPARG	3
GO:1901030	positive regulation of mitochondrial outer membrane permeabilization involved in apoptotic signaling pathway	3/83	34/16672	0.00524092	E2F1/YWHAH/YWHAQ	3
GO:0048709	oligodendrocyte differentiation	4/83	79/16672	0.00529996	CD9/HDAC1/HDAC2/PPARG	4
GO:0035265	organ growth	5/83	140/16672	0.00543388	AR/CARM1/ESR1/RARA/RXRA	5
GO:0010713	negative regulation of collagen metabolic process	2/83	8/16672	0.00543388	PPARD/PPARG	2
GO:0035247	peptidyl-arginine omega-N-methylation	2/83	8/16672	0.00543388	CARM1/PRMT1	2
GO:0045924	regulation of female receptivity	2/83	8/16672	0.00543388	THRA/THRB	2
GO:0060534	trachea cartilage development	2/83	8/16672	0.00543388	RARA/SRF	2
GO:1902806	regulation of cell cycle G1/S phase transition	5/83	142/16672	0.00573417	CARM1/E2F1/EP300/FHL1/PRMT1	5
GO:0031348	negative regulation of defense response	5/83	143/16672	0.00590135	NR1H2/NR1H3/PPARA/PPARD/PPARG	5
GO:0019048	modulation by virus of host morphology or physiology	3/83	36/16672	0.00600724	CD4/KPNB1/RXRA	3
GO:0031670	cellular response to nutrient	3/83	36/16672	0.00600724	PPARG/SRF/VDR	3
GO:0048662	negative regulation of smooth muscle cell proliferation	3/83	36/16672	0.00600724	PPARD/PPARG/PPARGC1A	3
GO:0048145	regulation of fibroblast proliferation	4/83	83/16672	0.00617292	E2F1/ESR1/JUN/PPARG	4
GO:0010948	negative regulation of cell cycle process	6/83	219/16672	0.00617292	BRCA1/CARM1/E2F1/EP300/FHL1/PRMT1	6
GO:1901991	negative regulation of mitotic cell cycle phase transition	5/83	145/16672	0.00617292	CARM1/E2F1/EP300/FHL1/PRMT1	5
GO:0007423	sensory organ development	9/83	497/16672	0.00630919	HDAC1/HDAC2/JUN/RARA/RORB/RXRA/SRF/STAT3/TULP3	9
GO:0071222	cellular response to lipopolysaccharide	5/83	146/16672	0.00630919	HDAC5/NR1H3/PPARD/PPARGC1A/RARA	5
GO:0048144	fibroblast proliferation	4/83	84/16672	0.00630919	E2F1/ESR1/JUN/PPARG	4
GO:1904951	positive regulation of establishment of protein localization	9/83	498/16672	0.00630919	CD38/CIB1/E2F1/HDAC3/NR1H2/PPARD/TNFRSF14/YWHAH/YWHAQ	9
GO:0006111	regulation of gluconeogenesis	3/83	37/16672	0.00630919	KAT2B/PPARA/PPARGC1A	3
GO:0007618	mating	3/83	37/16672	0.00630919	APP/THRA/THRB	3
GO:0010677	negative regulation of cellular carbohydrate metabolic process	3/83	37/16672	0.00630919	PPARA/PPARGC1A/STAT3	3
GO:0042517	positive regulation of tyrosine phosphorylation of Stat3 protein	3/83	37/16672	0.00630919	HDAC1/HDAC2/STAT3	3
GO:0043587	tongue morphogenesis	2/83	9/16672	0.0065704	HDAC1/HDAC2	2
GO:0044252	negative regulation of multicellular organismal metabolic process	2/83	9/16672	0.0065704	PPARD/PPARG	2
GO:0048548	regulation of pinocytosis	2/83	9/16672	0.0065704	NR1H2/NR1H3	2
GO:0060180	female mating behavior	2/83	9/16672	0.0065704	THRA/THRB	2
GO:0000077	DNA damage checkpoint	5/83	149/16672	0.00669166	BRCA1/CARM1/E2F1/EP300/PRMT1	5
GO:0032371	regulation of sterol transport	3/83	38/16672	0.00669166	NR1H2/NR1H3/PPARG	3
GO:0032374	regulation of cholesterol transport	3/83	38/16672	0.00669166	NR1H2/NR1H3/PPARG	3
GO:1904019	epithelial cell apoptotic process	4/83	86/16672	0.00670486	DNMT3A/E2F1/HDAC1/PPARGC1A	4
GO:0045926	negative regulation of growth	6/83	226/16672	0.00690889	CCDC85B/ESR2/FHL1/HNF4A/PPARD/PPARG	6
GO:0006694	steroid biosynthetic process	5/83	151/16672	0.00702945	NR0B1/NR5A1/PPARGC1A/REST/VDR	5
GO:0000082	G1/S transition of mitotic cell cycle	6/83	227/16672	0.00702945	CARM1/E2F1/EP300/FHL1/PHF8/PRMT1	6
GO:0071219	cellular response to molecule of bacterial origin	5/83	152/16672	0.00720829	HDAC5/NR1H3/PPARD/PPARGC1A/RARA	5
GO:0045787	positive regulation of cell cycle	7/83	315/16672	0.00727312	APP/BRCA1/CARM1/E2F1/EP300/PRMT1/RARA	7
GO:0002699	positive regulation of immune effector process	5/83	154/16672	0.00758981	MAP3K7/RARA/TNFRSF14/TRAF2/ZAP70	5
GO:0051146	striated muscle cell differentiation	6/83	231/16672	0.00758981	ACTN2/HDAC5/RARA/RXRA/SRF/THRA	6
GO:0045912	negative regulation of carbohydrate metabolic process	3/83	40/16672	0.00758981	PPARA/PPARGC1A/STAT3	3
GO:0042326	negative regulation of phosphorylation	8/83	414/16672	0.00771451	CBL/CIB1/HDAC3/JUN/KAT2B/PPARA/PPARGC1A/STAT3	8
GO:0033327	Leydig cell differentiation	2/83	10/16672	0.00776945	AR/NR0B1	2
GO:0035246	peptidyl-arginine N-methylation	2/83	10/16672	0.00776945	CARM1/PRMT1	2
GO:0045059	positive thymic T cell selection	2/83	10/16672	0.00776945	SRF/ZAP70	2
GO:0046498	S-adenosylhomocysteine metabolic process	2/83	10/16672	0.00776945	DNMT3A/DNMT3B	2
GO:0051006	positive regulation of lipoprotein lipase activity	2/83	10/16672	0.00776945	NR1H2/NR1H3	2
GO:0090239	regulation of histone H4 acetylation	2/83	10/16672	0.00776945	BRCA1/CTBP1	2
GO:0043902	positive regulation of multi-organism process	5/83	156/16672	0.00781526	CIB1/EP300/JUN/NR5A2/POLR2A	5
GO:1901988	negative regulation of cell cycle phase transition	5/83	156/16672	0.00781526	CARM1/E2F1/EP300/FHL1/PRMT1	5
GO:1903902	positive regulation of viral life cycle	4/83	91/16672	0.0078385	EP300/JUN/NR5A2/POLR2A	4
GO:0090068	positive regulation of cell cycle process	6/83	234/16672	0.0078385	APP/BRCA1/CARM1/E2F1/EP300/PRMT1	6
GO:0001960	negative regulation of cytokine-mediated signaling pathway	3/83	41/16672	0.0078385	NR1H2/NR1H3/PPARG	3
GO:0009409	response to cold	3/83	41/16672	0.0078385	PPARG/PPARGC1A/THRA	3
GO:0043470	regulation of carbohydrate catabolic process	3/83	41/16672	0.0078385	PPARA/PPARGC1A/STAT3	3
GO:1901028	regulation of mitochondrial outer membrane permeabilization involved in apoptotic signaling pathway	3/83	41/16672	0.0078385	E2F1/YWHAH/YWHAQ	3
GO:0007006	mitochondrial membrane organization	4/83	92/16672	0.00799477	E2F1/STAT3/YWHAH/YWHAQ	4
GO:0032368	regulation of lipid transport	4/83	92/16672	0.00799477	NR1H2/NR1H3/PPARA/PPARG	4
GO:0055007	cardiac muscle cell differentiation	4/83	92/16672	0.00799477	ACTN2/RARA/RXRA/SRF	4
GO:0007050	cell cycle arrest	6/83	236/16672	0.00799477	BRCA1/CARM1/E2F1/EP300/KAT2B/PRMT1	6
GO:0006338	chromatin remodeling	5/83	158/16672	0.00799477	ESR1/HDAC1/HDAC2/HDAC5/KAT2B	5
GO:0031669	cellular response to nutrient levels	5/83	158/16672	0.00799477	CBL/JUN/PPARG/SRF/VDR	5
GO:0033002	muscle cell proliferation	5/83	158/16672	0.00799477	JUN/PPARD/PPARG/PPARGC1A/RXRA	5
GO:0044843	cell cycle G1/S phase transition	6/83	237/16672	0.00814641	CARM1/E2F1/EP300/FHL1/PHF8/PRMT1	6
GO:0031570	DNA integrity checkpoint	5/83	159/16672	0.00818033	BRCA1/CARM1/E2F1/EP300/PRMT1	5
GO:0050434	positive regulation of viral transcription	3/83	42/16672	0.00819618	EP300/JUN/POLR2A	3
GO:1901796	regulation of signal transduction by p53 class mediator	5/83	161/16672	0.00860362	BRCA1/EP300/HDAC1/HDAC2/TAF1	5
GO:0042516	regulation of tyrosine phosphorylation of Stat3 protein	3/83	43/16672	0.00873474	HDAC1/HDAC2/STAT3	3
GO:0010566	regulation of ketone biosynthetic process	2/83	11/16672	0.00882642	PPARGC1A/REST	2
GO:0010867	positive regulation of triglyceride biosynthetic process	2/83	11/16672	0.00882642	NR1H2/NR1H3	2
GO:0045060	negative thymic T cell selection	2/83	11/16672	0.00882642	CD3E/ZAP70	2
GO:0060379	cardiac muscle cell myoblast differentiation	2/83	11/16672	0.00882642	REST/SRF	2
GO:0060433	bronchus development	2/83	11/16672	0.00882642	SRF/TULP3	2
GO:0060525	prostate glandular acinus development	2/83	11/16672	0.00882642	ESR1/RXRA	2
GO:0061365	positive regulation of triglyceride lipase activity	2/83	11/16672	0.00882642	NR1H2/NR1H3	2
GO:0006479	protein methylation	5/83	163/16672	0.00886197	BRCA1/CARM1/DNMT1/DNMT3B/PRMT1	5
GO:0008213	protein alkylation	5/83	163/16672	0.00886197	BRCA1/CARM1/DNMT1/DNMT3B/PRMT1	5
GO:0006304	DNA modification	4/83	96/16672	0.00895137	BRCA1/DNMT1/DNMT3A/DNMT3B	4
GO:0044773	mitotic DNA damage checkpoint	4/83	96/16672	0.00895137	CARM1/E2F1/EP300/PRMT1	4
GO:0042503	tyrosine phosphorylation of Stat3 protein	3/83	44/16672	0.00904132	HDAC1/HDAC2/STAT3	3
GO:0044003	modification by symbiont of host morphology or physiology	3/83	44/16672	0.00904132	CD4/KPNB1/RXRA	3
GO:0019395	fatty acid oxidation	4/83	97/16672	0.00921016	PPARA/PPARD/PPARG/PPARGC1A	4
GO:0051101	regulation of DNA binding	4/83	97/16672	0.00921016	E2F1/HDAC2/JUN/PPARA	4
GO:0046651	lymphocyte proliferation	6/83	246/16672	0.00937501	AHR/CD38/CD3E/CD4/TNFRSF14/ZAP70	6
GO:0051205	protein insertion into membrane	3/83	45/16672	0.00951197	E2F1/YWHAH/YWHAQ	3
GO:0060443	mammary gland morphogenesis	3/83	45/16672	0.00951197	AR/ESR1/VDR	3
GO:0060761	negative regulation of response to cytokine stimulus	3/83	45/16672	0.00951197	NR1H2/NR1H3/PPARG	3
GO:0032943	mononuclear cell proliferation	6/83	248/16672	0.00967495	AHR/CD38/CD3E/CD4/TNFRSF14/ZAP70	6
GO:0034440	lipid oxidation	4/83	99/16672	0.00978753	PPARA/PPARD/PPARG/PPARGC1A	4
GO:0050796	regulation of insulin secretion	5/83	168/16672	0.00981147	CD38/HDAC1/HNF4A/PPARD/REST	5
GO:0071356	cellular response to tumor necrosis factor	6/83	250/16672	0.00982093	BRCA1/CIB1/HDAC1/PPARGC1A/TNFRSF14/TRAF2	6
GO:1901214	regulation of neuron death	6/83	250/16672	0.00982093	HDAC1/JUN/PPARA/PPARGC1A/STAT3/TRAF2	6
GO:0014015	positive regulation of gliogenesis	3/83	46/16672	0.00982093	HDAC1/HDAC2/PPARG	3
GO:2000243	positive regulation of reproductive process	3/83	46/16672	0.00982093	AR/CIB1/NR5A1	3
GO:2001235	positive regulation of apoptotic signaling pathway	5/83	169/16672	0.00982093	E2F1/LCK/TRAF2/YWHAH/YWHAQ	5
GO:0010889	regulation of sequestering of triglyceride	2/83	12/16672	0.00982093	PPARA/PPARG	2
GO:0033147	negative regulation of intracellular estrogen receptor signaling pathway	2/83	12/16672	0.00982093	BRCA1/ZNF366	2
GO:0034969	histone arginine methylation	2/83	12/16672	0.00982093	CARM1/PRMT1	2
GO:0043383	negative T cell selection	2/83	12/16672	0.00982093	CD3E/ZAP70	2
GO:0043970	histone H3-K9 acetylation	2/83	12/16672	0.00982093	BRCA1/KAT2B	2
GO:0045086	positive regulation of interleukin-2 biosynthetic process	2/83	12/16672	0.00982093	CD3E/CD4	2
GO:0060442	branching involved in prostate gland morphogenesis	2/83	12/16672	0.00982093	ESR1/RXRA	2
GO:0060736	prostate gland growth	2/83	12/16672	0.00982093	AR/ESR1	2
GO:0060742	epithelial cell differentiation involved in prostate gland development	2/83	12/16672	0.00982093	AR/RXRA	2
GO:0071391	cellular response to estrogen stimulus	2/83	12/16672	0.00982093	ESR1/RARA	2
GO:0071216	cellular response to biotic stimulus	5/83	172/16672	0.01047	HDAC5/NR1H3/PPARD/PPARGC1A/RARA	5
GO:0044774	mitotic DNA integrity checkpoint	4/83	102/16672	0.01047	CARM1/E2F1/EP300/PRMT1	4
GO:0010876	lipid localization	7/83	347/16672	0.010636	NR1H2/NR1H3/NRIP1/PPARA/PPARD/PPARG/RXRA	7
GO:0050728	negative regulation of inflammatory response	4/83	103/16672	0.0108022	NR1H3/PPARA/PPARD/PPARG	4
GO:0035065	regulation of histone acetylation	3/83	48/16672	0.0108638	BRCA1/CTBP1/PPARGC1A	3
GO:0030323	respiratory tube development	5/83	174/16672	0.0108978	EP300/SRF/THRA/THRB/TULP3	5
GO:0044772	mitotic cell cycle phase transition	8/83	450/16672	0.0109916	APP/CARM1/CEP70/E2F1/EP300/FHL1/PHF8/PRMT1	8
GO:0007596	blood coagulation	7/83	350/16672	0.0110413	CD9/HDAC1/HDAC2/HNF4A/LCK/SRF/ZAP70	7
GO:0048524	positive regulation of viral process	4/83	104/16672	0.0110484	EP300/JUN/NR5A2/POLR2A	4
GO:0010001	glial cell differentiation	5/83	175/16672	0.0110484	CD9/HDAC1/HDAC2/PPARG/STAT3	5
GO:0060348	bone development	5/83	175/16672	0.0110484	CARM1/EP300/RARA/SRF/TULP3	5
GO:0030157	pancreatic juice secretion	2/83	13/16672	0.0112296	NR1H2/NR1H3	2
GO:0055098	response to low-density lipoprotein particle	2/83	13/16672	0.0112296	CD9/PPARG	2
GO:0009118	regulation of nucleoside metabolic process	3/83	49/16672	0.0112467	PPARA/PPARGC1A/STAT3	3
GO:0097345	mitochondrial outer membrane permeabilization	3/83	49/16672	0.0112467	E2F1/YWHAH/YWHAQ	3
GO:1903578	regulation of ATP metabolic process	3/83	49/16672	0.0112467	PPARA/PPARGC1A/STAT3	3
GO:0050817	coagulation	7/83	354/16672	0.0115381	CD9/HDAC1/HDAC2/HNF4A/LCK/SRF/ZAP70	7
GO:0007599	hemostasis	7/83	355/16672	0.0116895	CD9/HDAC1/HDAC2/HNF4A/LCK/SRF/ZAP70	7
GO:0019083	viral transcription	5/83	178/16672	0.0116895	EP300/HDAC1/JUN/POLR2A/REST	5
GO:0071385	cellular response to glucocorticoid stimulus	3/83	50/16672	0.0117636	DNMT3B/NR3C1/REST	3
GO:1902110	positive regulation of mitochondrial membrane permeability involved in apoptotic process	3/83	50/16672	0.0117636	E2F1/YWHAH/YWHAQ	3
GO:1902686	mitochondrial outer membrane permeabilization involved in programmed cell death	3/83	50/16672	0.0117636	E2F1/YWHAH/YWHAQ	3
GO:0070661	leukocyte proliferation	6/83	263/16672	0.0118702	AHR/CD38/CD3E/CD4/TNFRSF14/ZAP70	6
GO:0002576	platelet degranulation	4/83	107/16672	0.0118735	ACTN2/APP/CD9/PECAM1	4
GO:0006631	fatty acid metabolic process	7/83	357/16672	0.0118887	BRCA1/NR1H2/NR1H3/PPARA/PPARD/PPARG/PPARGC1A	7
GO:0010817	regulation of hormone levels	8/83	460/16672	0.0120591	CD38/ESR1/HDAC1/HNF4A/NR5A1/PPARD/PPARGC1A/REST	8
GO:0051216	cartilage development	5/83	180/16672	0.0120591	CARM1/ESRRA/RARA/SRF/THRA	5
GO:0048660	regulation of smooth muscle cell proliferation	4/83	108/16672	0.0121767	JUN/PPARD/PPARG/PPARGC1A	4
GO:0046635	positive regulation of alpha-beta T cell activation	3/83	51/16672	0.0121854	CD3E/RARA/ZAP70	3
GO:0045637	regulation of myeloid cell differentiation	5/83	181/16672	0.0121854	CIB1/ESRRA/JUN/PRMT1/RARA	5
GO:0061138	morphogenesis of a branching epithelium	5/83	182/16672	0.0121854	AR/ESR1/RXRA/SRF/VDR	5
GO:0002726	positive regulation of T cell cytokine production	2/83	14/16672	0.0121854	MAP3K7/TRAF2	2
GO:0003417	growth plate cartilage development	2/83	14/16672	0.0121854	CARM1/RARA	2
GO:0007252	I-kappaB phosphorylation	2/83	14/16672	0.0121854	MAP3K7/TRAF2	2
GO:0010288	response to lead ion	2/83	14/16672	0.0121854	APP/DNMT3A	2
GO:0010875	positive regulation of cholesterol efflux	2/83	14/16672	0.0121854	NR1H2/NR1H3	2
GO:0018216	peptidyl-arginine methylation	2/83	14/16672	0.0121854	CARM1/PRMT1	2
GO:0030238	male sex determination	2/83	14/16672	0.0121854	AR/NR0B1	2
GO:0035067	negative regulation of histone acetylation	2/83	14/16672	0.0121854	BRCA1/CTBP1	2
GO:0043923	positive regulation by host of viral transcription	2/83	14/16672	0.0121854	EP300/JUN	2
GO:0045723	positive regulation of fatty acid biosynthetic process	2/83	14/16672	0.0121854	NR1H2/NR1H3	2
GO:2000737	negative regulation of stem cell differentiation	2/83	14/16672	0.0121854	REST/STAT3	2
GO:0006606	protein import into nucleus	6/83	267/16672	0.0121854	CSE1L/HDAC3/JUN/KPNB1/STAT3/THRA	6
GO:0043414	macromolecule methylation	6/83	267/16672	0.0121854	BRCA1/CARM1/DNMT1/DNMT3A/DNMT3B/PRMT1	6
GO:0044744	protein targeting to nucleus	6/83	267/16672	0.0121854	CSE1L/HDAC3/JUN/KPNB1/STAT3/THRA	6
GO:1902593	single-organism nuclear import	6/83	267/16672	0.0121854	CSE1L/HDAC3/JUN/KPNB1/STAT3/THRA	6
GO:0034612	response to tumor necrosis factor	6/83	268/16672	0.0122442	BRCA1/CIB1/HDAC1/PPARGC1A/TNFRSF14/TRAF2	6
GO:0002683	negative regulation of immune system process	7/83	363/16672	0.0122442	CIB1/NR1H2/NR1H3/PPARG/PRMT1/RARA/TNFRSF14	7
GO:0010676	positive regulation of cellular carbohydrate metabolic process	3/83	52/16672	0.0122442	KAT2B/PPARA/PPARGC1A	3
GO:0035794	positive regulation of mitochondrial membrane permeability	3/83	52/16672	0.0122442	E2F1/YWHAH/YWHAQ	3
GO:0048146	positive regulation of fibroblast proliferation	3/83	52/16672	0.0122442	E2F1/ESR1/JUN	3
GO:0050829	defense response to Gram-negative bacterium	3/83	52/16672	0.0122442	APP/CD4/TNFRSF14	3
GO:0051193	regulation of cofactor metabolic process	3/83	52/16672	0.0122442	PPARA/PPARGC1A/STAT3	3
GO:0051196	regulation of coenzyme metabolic process	3/83	52/16672	0.0122442	PPARA/PPARGC1A/STAT3	3
GO:0051568	histone H3-K4 methylation	3/83	52/16672	0.0122442	BRCA1/DNMT1/DNMT3B	3
GO:0060688	regulation of morphogenesis of a branching structure	3/83	52/16672	0.0122442	AR/ESR1/RXRA	3
GO:0048659	smooth muscle cell proliferation	4/83	110/16672	0.0122442	JUN/PPARD/PPARG/PPARGC1A	4
GO:0046631	alpha-beta T cell activation	4/83	111/16672	0.0126285	CD3E/RARA/TNFRSF14/ZAP70	4
GO:0006383	transcription from RNA polymerase III promoter	3/83	53/16672	0.0128052	AR/BRCA1/ZNF143	3
GO:0045600	positive regulation of fat cell differentiation	3/83	53/16672	0.0128052	CARM1/PPARD/PPARG	3
GO:0071384	cellular response to corticosteroid stimulus	3/83	53/16672	0.0128052	DNMT3B/NR3C1/REST	3
GO:2001233	regulation of apoptotic signaling pathway	7/83	367/16672	0.0128422	AR/BRCA1/E2F1/LCK/TRAF2/YWHAH/YWHAQ	7
GO:0031668	cellular response to extracellular stimulus	5/83	186/16672	0.0128921	CBL/JUN/PPARG/SRF/VDR	5
GO:0043280	positive regulation of cysteine-type endopeptidase activity involved in apoptotic process	4/83	113/16672	0.0132806	LCK/PPARG/REST/TRAF2	4
GO:0045055	regulated exocytosis	6/83	274/16672	0.0132806	ACTN2/APP/CD9/PECAM1/REST/ZAP70	6
GO:0042116	macrophage activation	3/83	54/16672	0.0132806	JUN/NR1H3/ZAP70	3
GO:0030730	sequestering of triglyceride	2/83	15/16672	0.0132806	PPARA/PPARG	2
GO:0042921	glucocorticoid receptor signaling pathway	2/83	15/16672	0.0132806	NR3C1/YWHAH	2
GO:0051004	regulation of lipoprotein lipase activity	2/83	15/16672	0.0132806	NR1H2/NR1H3	2
GO:0060788	ectodermal placode formation	2/83	15/16672	0.0132806	HDAC1/HDAC2	2
GO:0071697	ectodermal placode morphogenesis	2/83	15/16672	0.0132806	HDAC1/HDAC2	2
GO:0008637	apoptotic mitochondrial changes	4/83	114/16672	0.013525	E2F1/JUN/YWHAH/YWHAQ	4
GO:0019080	viral gene expression	5/83	189/16672	0.0135425	EP300/HDAC1/JUN/POLR2A/REST	5
GO:0044770	cell cycle phase transition	8/83	477/16672	0.0136853	APP/CARM1/CEP70/E2F1/EP300/FHL1/PHF8/PRMT1	8
GO:1902108	regulation of mitochondrial membrane permeability involved in apoptotic process	3/83	55/16672	0.0138439	E2F1/YWHAH/YWHAQ	3
GO:0044283	small molecule biosynthetic process	8/83	480/16672	0.0141669	BRCA1/KAT2B/NR1H2/NR1H3/PPARA/PPARGC1A/REST/VDR	8
GO:0006979	response to oxidative stress	7/83	376/16672	0.0142674	APP/CD38/HDAC1/HDAC2/JUN/PPARGC1A/TRAF2	7
GO:0032409	regulation of transporter activity	5/83	192/16672	0.0143529	ACTN2/FHL1/PPARG/PPARGC1A/YWHAH	5
GO:0045685	regulation of glial cell differentiation	3/83	56/16672	0.0144609	HDAC1/HDAC2/PPARG	3
GO:0001501	skeletal system development	8/83	483/16672	0.0146035	CARM1/EP300/ESRRA/RARA/SRF/THRA/TULP3/VDR	8
GO:0006349	regulation of gene expression by genetic imprinting	2/83	16/16672	0.0146324	BRCA1/DNMT3A	2
GO:0006474	N-terminal protein amino acid acetylation	2/83	16/16672	0.0146324	EP300/KAT2B	2
GO:0010866	regulation of triglyceride biosynthetic process	2/83	16/16672	0.0146324	NR1H2/NR1H3	2
GO:0035855	megakaryocyte development	2/83	16/16672	0.0146324	EP300/SRF	2
GO:0048385	regulation of retinoic acid receptor signaling pathway	2/83	16/16672	0.0146324	CTBP2/NR2C1	2
GO:0060218	hematopoietic stem cell differentiation	2/83	16/16672	0.0146324	CHD2/SRF	2
GO:0071168	protein localization to chromatin	2/83	16/16672	0.0146324	ESR1/RAD21	2
GO:0071696	ectodermal placode development	2/83	16/16672	0.0146324	HDAC1/HDAC2	2
GO:0001763	morphogenesis of a branching structure	5/83	194/16672	0.0146619	AR/ESR1/RXRA/SRF/VDR	5
GO:0090276	regulation of peptide hormone secretion	5/83	194/16672	0.0146619	CD38/HDAC1/HNF4A/PPARD/REST	5
GO:0031060	regulation of histone methylation	3/83	57/16672	0.0148311	BRCA1/DNMT1/DNMT3B	3
GO:1900543	negative regulation of purine nucleotide metabolic process	3/83	57/16672	0.0148311	PPARA/PPARGC1A/STAT3	3
GO:0010469	regulation of receptor activity	4/83	119/16672	0.0151617	ACTN2/APP/CBL/PPARGC1A	4
GO:0030073	insulin secretion	5/83	196/16672	0.0152062	CD38/HDAC1/HNF4A/PPARD/REST	5
GO:0051170	nuclear import	6/83	285/16672	0.0152821	CSE1L/HDAC3/JUN/KPNB1/STAT3/THRA	6
GO:0002718	regulation of cytokine production involved in immune response	3/83	58/16672	0.0154365	MAP3K7/TNFRSF14/TRAF2	3
GO:0045980	negative regulation of nucleotide metabolic process	3/83	58/16672	0.0154365	PPARA/PPARGC1A/STAT3	3
GO:0022612	gland morphogenesis	4/83	120/16672	0.0154779	AR/ESR1/RXRA/VDR	4
GO:0071375	cellular response to peptide hormone stimulus	6/83	287/16672	0.0156988	ACTN2/ESRRA/HDAC5/KAT2B/PPARG/STAT3	6
GO:0044057	regulation of system process	8/83	492/16672	0.0157308	CD38/NR1H2/NR1H3/PPARD/PPARGC1A/SRF/THRA/THRB	8
GO:0048638	regulation of developmental growth	6/83	288/16672	0.0157689	APP/AR/CARM1/PPARD/SRF/STAT3	6
GO:0002791	regulation of peptide secretion	5/83	199/16672	0.0157689	CD38/HDAC1/HNF4A/PPARD/REST	5
GO:0032846	positive regulation of homeostatic process	5/83	199/16672	0.0157689	CD4/HNF4A/NR1H3/PPARGC1A/PRMT1	5
GO:0042531	positive regulation of tyrosine phosphorylation of STAT protein	3/83	59/16672	0.0157689	HDAC1/HDAC2/STAT3	3
GO:0043966	histone H3 acetylation	3/83	59/16672	0.0157689	BRCA1/KAT2B/MAP3K7	3
GO:0031958	corticosteroid receptor signaling pathway	2/83	17/16672	0.0157689	NR3C1/YWHAH	2
GO:0032373	positive regulation of sterol transport	2/83	17/16672	0.0157689	NR1H2/NR1H3	2
GO:0032376	positive regulation of cholesterol transport	2/83	17/16672	0.0157689	NR1H2/NR1H3	2
GO:0033630	positive regulation of cell adhesion mediated by integrin	2/83	17/16672	0.0157689	CIB1/ZAP70	2
GO:0046885	regulation of hormone biosynthetic process	2/83	17/16672	0.0157689	PPARGC1A/REST	2
GO:0055012	ventricular cardiac muscle cell differentiation	2/83	17/16672	0.0157689	RARA/RXRA	2
GO:0060261	positive regulation of transcription initiation from RNA polymerase II promoter	2/83	17/16672	0.0157689	SRF/TAF1	2
GO:1902170	cellular response to reactive nitrogen species	2/83	17/16672	0.0157689	PPARGC1A/TRAF2	2
GO:0010977	negative regulation of neuron projection development	4/83	122/16672	0.0159138	CARM1/CIB1/HDAC2/YWHAH	4
GO:2001056	positive regulation of cysteine-type endopeptidase activity	4/83	122/16672	0.0159138	LCK/PPARG/REST/TRAF2	4
GO:0043434	response to peptide hormone	7/83	390/16672	0.0162208	ACTN2/ESRRA/HDAC5/KAT2B/PPARA/PPARG/STAT3	7
GO:0090087	regulation of peptide transport	5/83	201/16672	0.0162277	CD38/HDAC1/HNF4A/PPARD/REST	5
GO:0010675	regulation of cellular carbohydrate metabolic process	4/83	123/16672	0.0162975	KAT2B/PPARA/PPARGC1A/STAT3	4
GO:0046889	positive regulation of lipid biosynthetic process	3/83	60/16672	0.0163167	NR1H2/NR1H3/PPARGC1A	3
GO:0050671	positive regulation of lymphocyte proliferation	4/83	124/16672	0.0167168	CD38/CD3E/CD4/ZAP70	4
GO:1901990	regulation of mitotic cell cycle phase transition	6/83	294/16672	0.0169665	APP/CARM1/E2F1/EP300/FHL1/PRMT1	6
GO:0042733	embryonic digit morphogenesis	3/83	61/16672	0.0170066	HDAC1/HDAC2/TULP3	3
GO:0032946	positive regulation of mononuclear cell proliferation	4/83	125/16672	0.0171115	CD38/CD3E/CD4/ZAP70	4
GO:0007250	activation of NF-kappaB-inducing kinase activity	2/83	18/16672	0.0171155	MAP3K7/TRAF2	2
GO:0035357	peroxisome proliferator activated receptor signaling pathway	2/83	18/16672	0.0171155	PPARG/RXRA	2
GO:0044030	regulation of DNA methylation	2/83	18/16672	0.0171155	BRCA1/DNMT3A	2
GO:0045653	negative regulation of megakaryocyte differentiation	2/83	18/16672	0.0171155	CIB1/PRMT1	2
GO:0046641	positive regulation of alpha-beta T cell proliferation	2/83	18/16672	0.0171155	CD3E/ZAP70	2
GO:0055094	response to lipoprotein particle	2/83	18/16672	0.0171155	CD9/PPARG	2
GO:0060749	mammary gland alveolus development	2/83	18/16672	0.0171155	AR/ESR1	2
GO:0061377	mammary gland lobule development	2/83	18/16672	0.0171155	AR/ESR1	2
GO:0043967	histone H4 acetylation	3/83	62/16672	0.0174599	BRCA1/CTBP1/EP300	3
GO:0060193	positive regulation of lipase activity	3/83	62/16672	0.0174599	ESR1/NR1H2/NR1H3	3
GO:0009266	response to temperature stimulus	5/83	207/16672	0.017716	EP300/HDAC2/PPARG/PPARGC1A/THRA	5
GO:0033500	carbohydrate homeostasis	5/83	207/16672	0.017716	HNF4A/PPARG/PPARGC1A/SRF/STAT3	5
GO:0038093	Fc receptor signaling pathway	5/83	207/16672	0.017716	ARPC3/CD247/FCGR3A/JUN/MAP3K7	5
GO:0042593	glucose homeostasis	5/83	207/16672	0.017716	HNF4A/PPARG/PPARGC1A/SRF/STAT3	5
GO:0071560	cellular response to transforming growth factor beta stimulus	5/83	207/16672	0.017716	CBL/HDAC2/JUN/MAP3K7/PPARGC1A	5
GO:0030336	negative regulation of cell migration	5/83	208/16672	0.0180508	HDAC5/PPARD/PPARGC1A/SRF/STAT3	5
GO:0035270	endocrine system development	4/83	128/16672	0.01807	NR0B1/NR5A1/SRF/THRA	4
GO:0071559	response to transforming growth factor beta	5/83	209/16672	0.0183577	CBL/HDAC2/JUN/MAP3K7/PPARGC1A	5
GO:0044236	multicellular organism metabolic process	4/83	129/16672	0.0183795	HDAC2/PPARD/PPARG/PPARGC1A	4
GO:0045930	negative regulation of mitotic cell cycle	5/83	210/16672	0.0183795	CARM1/E2F1/EP300/FHL1/PRMT1	5
GO:0006907	pinocytosis	2/83	19/16672	0.0183795	NR1H2/NR1H3	2
GO:0010002	cardioblast differentiation	2/83	19/16672	0.0183795	REST/SRF	2
GO:0014912	negative regulation of smooth muscle cell migration	2/83	19/16672	0.0183795	PPARD/PPARGC1A	2
GO:0031935	regulation of chromatin silencing	2/83	19/16672	0.0183795	DNMT1/PHF8	2
GO:0045076	regulation of interleukin-2 biosynthetic process	2/83	19/16672	0.0183795	CD3E/CD4	2
GO:0046697	decidualization	2/83	19/16672	0.0183795	PPARD/VDR	2
GO:0060438	trachea development	2/83	19/16672	0.0183795	RARA/SRF	2
GO:0090049	regulation of cell migration involved in sprouting angiogenesis	2/83	19/16672	0.0183795	CIB1/HDAC5	2
GO:0090208	positive regulation of triglyceride metabolic process	2/83	19/16672	0.0183795	NR1H2/NR1H3	2
GO:0050853	B cell receptor signaling pathway	3/83	64/16672	0.0184112	CD38/LCK/ZAP70	3
GO:0061180	mammary gland epithelium development	3/83	64/16672	0.0184112	AR/ESR1/VDR	3
GO:1901653	cellular response to peptide	6/83	304/16672	0.0188134	ACTN2/ESRRA/HDAC5/KAT2B/PPARG/STAT3	6
GO:0051092	positive regulation of NF-kappaB transcription factor activity	4/83	131/16672	0.0190564	AR/CIB1/MAP3K7/TRAF2	4
GO:0070665	positive regulation of leukocyte proliferation	4/83	131/16672	0.0190564	CD38/CD3E/CD4/ZAP70	4
GO:0044033	multi-organism metabolic process	5/83	213/16672	0.0193176	EP300/HDAC1/JUN/POLR2A/REST	5
GO:0060562	epithelial tube morphogenesis	6/83	307/16672	0.0195978	AR/ESR1/RARA/SRF/TULP3/VDR	6
GO:0002702	positive regulation of production of molecular mediator of immune response	3/83	66/16672	0.0198113	MAP3K7/TNFRSF14/TRAF2	3
GO:0045913	positive regulation of carbohydrate metabolic process	3/83	66/16672	0.0198113	KAT2B/PPARA/PPARGC1A	3
GO:0003416	endochondral bone growth	2/83	20/16672	0.0198113	CARM1/RARA	2
GO:0009299	mRNA transcription	2/83	20/16672	0.0198113	PPARD/SRF	2
GO:0010874	regulation of cholesterol efflux	2/83	20/16672	0.0198113	NR1H2/NR1H3	2
GO:0018195	peptidyl-arginine modification	2/83	20/16672	0.0198113	CARM1/PRMT1	2
GO:0043586	tongue development	2/83	20/16672	0.0198113	HDAC1/HDAC2	2
GO:0060008	Sertoli cell differentiation	2/83	20/16672	0.0198113	NR0B1/RARA	2
GO:0060969	negative regulation of gene silencing	2/83	20/16672	0.0198113	ESR1/PHF8	2
GO:0060627	regulation of vesicle-mediated transport	7/83	413/16672	0.0202041	ACTN2/CBL/NR1H2/NR1H3/PPARG/REST/ZAP70	7
GO:0051099	positive regulation of binding	4/83	134/16672	0.0202041	CTBP2/EP300/RARA/TRAF2	4
GO:0006096	glycolytic process	3/83	67/16672	0.0203178	PPARA/PPARGC1A/STAT3	3
GO:0042509	regulation of tyrosine phosphorylation of STAT protein	3/83	67/16672	0.0203178	HDAC1/HDAC2/STAT3	3
GO:0048167	regulation of synaptic plasticity	4/83	135/16672	0.0206402	CD38/RARA/SRF/YWHAH	4
GO:0006869	lipid transport	6/83	313/16672	0.0209513	NR1H2/NR1H3/PPARA/PPARD/PPARG/RXRA	6
GO:1903706	regulation of hemopoiesis	6/83	313/16672	0.0209513	CIB1/ESRRA/JUN/PRMT1/RARA/ZAP70	6
GO:0006757	ATP generation from ADP	3/83	68/16672	0.020971	PPARA/PPARGC1A/STAT3	3
GO:0033077	T cell differentiation in thymus	3/83	68/16672	0.020971	CD3E/SRF/ZAP70	3
GO:0071594	thymocyte aggregation	3/83	68/16672	0.020971	CD3E/SRF/ZAP70	3
GO:2000146	negative regulation of cell motility	5/83	220/16672	0.0213573	HDAC5/PPARD/PPARGC1A/SRF/STAT3	5
GO:0002724	regulation of T cell cytokine production	2/83	21/16672	0.0213573	MAP3K7/TRAF2	2
GO:0030325	adrenal gland development	2/83	21/16672	0.0213573	NR0B1/NR5A1	2
GO:1901987	regulation of cell cycle phase transition	6/83	315/16672	0.0213573	APP/CARM1/E2F1/EP300/FHL1/PRMT1	6
GO:0015718	monocarboxylic acid transport	4/83	137/16672	0.0213873	PPARA/PPARD/PPARG/RXRA	4
GO:0000075	cell cycle checkpoint	5/83	221/16672	0.0215627	BRCA1/CARM1/E2F1/EP300/PRMT1	5
GO:0017038	protein import	6/83	316/16672	0.0215627	CSE1L/HDAC3/JUN/KPNB1/STAT3/THRA	6
GO:0002040	sprouting angiogenesis	3/83	69/16672	0.0215627	CIB1/HDAC5/SRF	3
GO:0001890	placenta development	4/83	138/16672	0.0218013	PPARD/PPARG/RXRA/VDR	4
GO:0010631	epithelial cell migration	5/83	222/16672	0.0218781	CIB1/HDAC5/JUN/PPARD/SRF	5
GO:0007059	chromosome segregation	6/83	318/16672	0.0221006	BRCA1/KPNB1/NR3C1/RAD21/TEX11/XPO1	6
GO:0035264	multicellular organism growth	4/83	139/16672	0.0222553	APP/AR/RARA/STAT3	4
GO:1901652	response to peptide	7/83	425/16672	0.0227145	ACTN2/ESRRA/HDAC5/KAT2B/PPARA/PPARG/STAT3	7
GO:0001959	regulation of cytokine-mediated signaling pathway	4/83	140/16672	0.0227145	NR1H2/NR1H3/PPARG/TRAF2	4
GO:0042129	regulation of T cell proliferation	4/83	140/16672	0.0227145	CD3E/CD4/TNFRSF14/ZAP70	4
GO:0090132	epithelium migration	5/83	225/16672	0.022716	CIB1/HDAC5/JUN/PPARD/SRF	5
GO:0006700	C21-steroid hormone biosynthetic process	2/83	22/16672	0.022716	PPARGC1A/REST	2
GO:0032753	positive regulation of interleukin-4 production	2/83	22/16672	0.022716	CD3E/RARA	2
GO:0035902	response to immobilization stress	2/83	22/16672	0.022716	NR0B1/PPARG	2
GO:0042094	interleukin-2 biosynthetic process	2/83	22/16672	0.022716	CD3E/CD4	2
GO:0060351	cartilage development involved in endochondral bone morphogenesis	2/83	22/16672	0.022716	CARM1/RARA	2
GO:0098868	bone growth	2/83	22/16672	0.022716	CARM1/RARA	2
GO:0007260	tyrosine phosphorylation of STAT protein	3/83	71/16672	0.0228001	HDAC1/HDAC2/STAT3	3
GO:0002367	cytokine production involved in immune response	3/83	72/16672	0.023632	MAP3K7/TNFRSF14/TRAF2	3
GO:0002824	positive regulation of adaptive immune response based on somatic recombination of immune receptors built from immunoglobulin superfamily domains	3/83	72/16672	0.023632	CD4/MAP3K7/TRAF2	3
GO:0051051	negative regulation of transport	7/83	430/16672	0.0237353	ACTN2/HDAC1/NR1H2/NR1H3/REST/THRA/YWHAQ	7
GO:0030301	cholesterol transport	3/83	73/16672	0.0242603	NR1H2/NR1H3/PPARG	3
GO:0043534	blood vessel endothelial cell migration	3/83	73/16672	0.0242603	CIB1/HDAC5/SRF	3
GO:0031345	negative regulation of cell projection organization	4/83	144/16672	0.0242603	CARM1/CIB1/HDAC2/YWHAH	4
GO:0019054	modulation by virus of host process	2/83	23/16672	0.0242603	CD4/KPNB1	2
GO:0045979	positive regulation of nucleoside metabolic process	2/83	23/16672	0.0242603	PPARGC1A/STAT3	2
GO:0060292	long term synaptic depression	2/83	23/16672	0.0242603	CD38/SRF	2
GO:0060765	regulation of androgen receptor signaling pathway	2/83	23/16672	0.0242603	EP300/HDAC1	2
GO:0060964	regulation of gene silencing by miRNA	2/83	23/16672	0.0242603	ESR1/STAT3	2
GO:0071354	cellular response to interleukin-6	2/83	23/16672	0.0242603	PPARGC1A/STAT3	2
GO:1903580	positive regulation of ATP metabolic process	2/83	23/16672	0.0242603	PPARGC1A/STAT3	2
GO:0042063	gliogenesis	5/83	231/16672	0.0247064	CD9/HDAC1/HDAC2/PPARG/STAT3	5
GO:0090130	tissue migration	5/83	231/16672	0.0247064	CIB1/HDAC5/JUN/PPARD/SRF	5
GO:0015918	sterol transport	3/83	74/16672	0.0249523	NR1H2/NR1H3/PPARG	3
GO:0010720	positive regulation of cell development	7/83	436/16672	0.0250045	CIB1/DNMT3B/HDAC1/HDAC2/PPARG/RARA/SRF	7
GO:0006109	regulation of carbohydrate metabolic process	4/83	146/16672	0.0251857	KAT2B/PPARA/PPARGC1A/STAT3	4
GO:0019722	calcium-mediated signaling	4/83	146/16672	0.0251857	CD3E/CD4/CIB1/ZAP70	4
GO:0060759	regulation of response to cytokine stimulus	4/83	146/16672	0.0251857	NR1H2/NR1H3/PPARG/TRAF2	4
GO:0032941	secretion by tissue	3/83	75/16672	0.0256618	NR1H2/NR1H3/VDR	3
GO:0045445	myoblast differentiation	3/83	75/16672	0.0256618	PPARD/REST/SRF	3
GO:0030072	peptide hormone secretion	5/83	234/16672	0.0257468	CD38/HDAC1/HNF4A/PPARD/REST	5
GO:0008211	glucocorticoid metabolic process	2/83	24/16672	0.0257803	REST/YWHAH	2
GO:0032369	negative regulation of lipid transport	2/83	24/16672	0.0257803	NR1H2/NR1H3	2
GO:0051123	RNA polymerase II transcriptional preinitiation complex assembly	2/83	24/16672	0.0257803	TAF1/THRA	2
GO:0071398	cellular response to fatty acid	2/83	24/16672	0.0257803	E2F1/PPARGC1A	2
GO:1904037	positive regulation of epithelial cell apoptotic process	2/83	24/16672	0.0257803	HDAC1/PPARGC1A	2
GO:0002821	positive regulation of adaptive immune response	3/83	76/16672	0.0262201	CD4/MAP3K7/TRAF2	3
GO:0046031	ADP metabolic process	3/83	76/16672	0.0262201	PPARA/PPARGC1A/STAT3	3
GO:0046427	positive regulation of JAK-STAT cascade	3/83	76/16672	0.0262201	HDAC1/HDAC2/STAT3	3
GO:1904894	positive regulation of STAT cascade	3/83	76/16672	0.0262201	HDAC1/HDAC2/STAT3	3
GO:0032868	response to insulin	5/83	236/16672	0.0262686	ESRRA/HDAC5/KAT2B/PPARA/PPARG	5
GO:0032259	methylation	6/83	335/16672	0.0263725	BRCA1/CARM1/DNMT1/DNMT3A/DNMT3B/PRMT1	6
GO:0048754	branching morphogenesis of an epithelial tube	4/83	149/16672	0.0264299	AR/ESR1/SRF/VDR	4
GO:0042113	B cell activation	5/83	237/16672	0.0266116	AHR/CD38/EP300/HDAC5/ZAP70	5
GO:0042594	response to starvation	4/83	150/16672	0.0269718	CBL/JUN/PPARG/PPARGC1A	4
GO:0007176	regulation of epidermal growth factor-activated receptor activity	2/83	25/16672	0.0273103	APP/CBL	2
GO:0030878	thyroid gland development	2/83	25/16672	0.0273103	SRF/THRA	2
GO:0045879	negative regulation of smoothened signaling pathway	2/83	25/16672	0.0273103	CD3E/TULP3	2
GO:0060487	lung epithelial cell differentiation	2/83	25/16672	0.0273103	THRA/THRB	2
GO:0071295	cellular response to vitamin	2/83	25/16672	0.0273103	PPARG/VDR	2
GO:0071514	genetic imprinting	2/83	25/16672	0.0273103	BRCA1/DNMT3A	2
GO:0007093	mitotic cell cycle checkpoint	4/83	151/16672	0.0273163	CARM1/E2F1/EP300/PRMT1	4
GO:0045786	negative regulation of cell cycle	7/83	447/16672	0.0273537	BRCA1/CARM1/E2F1/EP300/FHL1/KAT2B/PRMT1	7
GO:0060191	regulation of lipase activity	3/83	78/16672	0.0275909	ESR1/NR1H2/NR1H3	3
GO:0006913	nucleocytoplasmic transport	7/83	449/16672	0.027923	CSE1L/HDAC3/JUN/KPNB1/STAT3/THRA/XPO1	7
GO:0002790	peptide secretion	5/83	241/16672	0.0280097	CD38/HDAC1/HNF4A/PPARD/REST	5
GO:0051147	regulation of muscle cell differentiation	4/83	153/16672	0.0283688	HDAC5/PPARD/SRF/THRA	4
GO:0006094	gluconeogenesis	3/83	79/16672	0.0283688	KAT2B/PPARA/PPARGC1A	3
GO:0045815	positive regulation of gene expression, epigenetic	3/83	79/16672	0.0283688	EP300/KAT2B/PHF8	3
GO:0060537	muscle tissue development	6/83	343/16672	0.0287029	ACTN2/EP300/PPARGC1A/RARA/RXRA/SRF	6
GO:0032350	regulation of hormone metabolic process	2/83	26/16672	0.0288491	PPARGC1A/REST	2
GO:0044068	modulation by symbiont of host cellular process	2/83	26/16672	0.0288491	CD4/KPNB1	2
GO:0060147	regulation of posttranscriptional gene silencing	2/83	26/16672	0.0288491	ESR1/STAT3	2
GO:0060479	lung cell differentiation	2/83	26/16672	0.0288491	THRA/THRB	2
GO:0060966	regulation of gene silencing by RNA	2/83	26/16672	0.0288491	ESR1/STAT3	2
GO:0070897	DNA-templated transcriptional preinitiation complex assembly	2/83	26/16672	0.0288491	TAF1/THRA	2
GO:0006919	activation of cysteine-type endopeptidase activity involved in apoptotic process	3/83	80/16672	0.0290291	LCK/PPARG/TRAF2	3
GO:0035239	tube morphogenesis	6/83	345/16672	0.0291565	AR/ESR1/RARA/SRF/TULP3/VDR	6
GO:0010035	response to inorganic substance	7/83	455/16672	0.0293364	APP/CD9/DNMT3A/HDAC2/JUN/PPARGC1A/TRAF2	7
GO:2000027	regulation of organ morphogenesis	5/83	245/16672	0.0293644	AR/CARM1/ESR1/RXRA/VDR	5
GO:0046883	regulation of hormone secretion	5/83	246/16672	0.0298158	CD38/HDAC1/HNF4A/PPARD/REST	5
GO:0051169	nuclear transport	7/83	457/16672	0.0298894	CSE1L/HDAC3/JUN/KPNB1/STAT3/THRA/XPO1	7
GO:1903708	positive regulation of hemopoiesis	4/83	157/16672	0.0302364	JUN/PRMT1/RARA/ZAP70	4
GO:0010608	posttranscriptional regulation of gene expression	7/83	459/16672	0.0302364	APP/E2F1/ESR1/RARA/RXRA/STAT3/XPO1	7
GO:0030900	forebrain development	6/83	349/16672	0.0302364	APP/E2F1/NR0B1/PPARGC1A/RARA/SRF	6
GO:0040013	negative regulation of locomotion	5/83	248/16672	0.0302364	HDAC5/PPARD/PPARGC1A/SRF/STAT3	5
GO:0002369	T cell cytokine production	2/83	27/16672	0.0302364	MAP3K7/TRAF2	2
GO:0008209	androgen metabolic process	2/83	27/16672	0.0302364	ESR1/PPARGC1A	2
GO:0032673	regulation of interleukin-4 production	2/83	27/16672	0.0302364	CD3E/RARA	2
GO:0070741	response to interleukin-6	2/83	27/16672	0.0302364	PPARGC1A/STAT3	2
GO:1901522	positive regulation of transcription from RNA polymerase II promoter involved in cellular response to chemical stimulus	2/83	27/16672	0.0302364	EP300/RXRA	2
GO:0019319	hexose biosynthetic process	3/83	82/16672	0.0302364	KAT2B/PPARA/PPARGC1A	3
GO:0022602	ovulation cycle process	3/83	82/16672	0.0302364	ESR1/NR5A1/NRIP1	3
GO:0042475	odontogenesis of dentin-containing tooth	3/83	82/16672	0.0302364	HDAC1/HDAC2/PPARA	3
GO:0043255	regulation of carbohydrate biosynthetic process	3/83	82/16672	0.0302364	KAT2B/PPARA/PPARGC1A	3
GO:0050688	regulation of defense response to virus	3/83	82/16672	0.0302364	CD247/CD4/LCK	3
GO:0045088	regulation of innate immune response	6/83	350/16672	0.0303556	EP300/ESR1/MAP3K7/NR1H2/NR1H3/PPARG	6
GO:0051271	negative regulation of cellular component movement	5/83	249/16672	0.0305826	HDAC5/PPARD/PPARGC1A/SRF/STAT3	5
GO:0007586	digestion	4/83	160/16672	0.031595	NR1H2/NR1H3/PPARGC1A/VDR	4
GO:0051701	interaction with host	4/83	160/16672	0.031595	CD4/KPNB1/RXRA/TNFRSF14	4
GO:0090150	establishment of protein localization to membrane	6/83	354/16672	0.0317618	ACTN2/AR/CIB1/E2F1/YWHAH/YWHAQ	6
GO:0007589	body fluid secretion	3/83	84/16672	0.0317618	NR1H2/NR1H3/VDR	3
GO:1903901	negative regulation of viral life cycle	3/83	84/16672	0.0317618	HDAC1/JUN/REST	3
GO:0031365	N-terminal protein amino acid modification	2/83	28/16672	0.0317618	EP300/KAT2B	2
GO:0035066	positive regulation of histone acetylation	2/83	28/16672	0.0317618	BRCA1/PPARGC1A	2
GO:0043368	positive T cell selection	2/83	28/16672	0.0317618	SRF/ZAP70	2
GO:0071868	cellular response to monoamine stimulus	2/83	28/16672	0.0317618	APP/HDAC2	2
GO:0071870	cellular response to catecholamine stimulus	2/83	28/16672	0.0317618	APP/HDAC2	2
GO:1903670	regulation of sprouting angiogenesis	2/83	28/16672	0.0317618	CIB1/HDAC5	2
GO:0030168	platelet activation	4/83	161/16672	0.0317618	CD9/LCK/SRF/ZAP70	4
GO:1901654	response to ketone	4/83	161/16672	0.0317618	CD38/DNMT3B/NR1H3/PPARG	4
GO:0051052	regulation of DNA metabolic process	6/83	355/16672	0.0317618	BRCA1/DNMT1/DNMT3A/JUN/PPARG/PPARGC1A	6
GO:0007219	Notch signaling pathway	4/83	162/16672	0.032317	APP/EP300/KAT2B/STAT3	4
GO:0071496	cellular response to external stimulus	5/83	254/16672	0.032317	CBL/JUN/PPARG/SRF/VDR	5
GO:0015908	fatty acid transport	3/83	85/16672	0.032317	PPARA/PPARD/PPARG	3
GO:0022600	digestive system process	3/83	85/16672	0.032317	NR1H2/NR1H3/VDR	3
GO:0043467	regulation of generation of precursor metabolites and energy	3/83	85/16672	0.032317	PPARA/PPARGC1A/STAT3	3
GO:0045638	negative regulation of myeloid cell differentiation	3/83	85/16672	0.032317	CIB1/PRMT1/RARA	3
GO:0060333	interferon-gamma-mediated signaling pathway	3/83	85/16672	0.032317	NR1H2/NR1H3/PPARG	3
GO:0043410	positive regulation of MAPK cascade	7/83	471/16672	0.0331402	AR/CIB1/JUN/MAP3K7/PRMT1/TNFRSF14/TRAF2	7
GO:0015833	peptide transport	5/83	256/16672	0.0331402	CD38/HDAC1/HNF4A/PPARD/REST	5
GO:0002705	positive regulation of leukocyte mediated immunity	3/83	86/16672	0.0331402	MAP3K7/TRAF2/ZAP70	3
GO:0006165	nucleoside diphosphate phosphorylation	3/83	86/16672	0.0331402	PPARA/PPARGC1A/STAT3	3
GO:0046364	monosaccharide biosynthetic process	3/83	86/16672	0.0331402	KAT2B/PPARA/PPARGC1A	3
GO:0001975	response to amphetamine	2/83	29/16672	0.0331885	HDAC1/HDAC2	2
GO:0045652	regulation of megakaryocyte differentiation	2/83	29/16672	0.0331885	CIB1/PRMT1	2
GO:0097009	energy homeostasis	2/83	29/16672	0.0331885	PPARGC1A/STAT3	2
GO:2000758	positive regulation of peptidyl-lysine acetylation	2/83	29/16672	0.0331885	BRCA1/PPARGC1A	2
GO:0042098	T cell proliferation	4/83	165/16672	0.0336966	CD3E/CD4/TNFRSF14/ZAP70	4
GO:0048863	stem cell differentiation	4/83	165/16672	0.0336966	CHD2/REST/SRF/STAT3	4
GO:0052548	regulation of endopeptidase activity	6/83	363/16672	0.0343079	APP/LCK/PPARG/REST/STAT3/TRAF2	6
GO:0010822	positive regulation of mitochondrion organization	4/83	166/16672	0.0343079	E2F1/PPARGC1A/YWHAH/YWHAQ	4
GO:0072657	protein localization to membrane	7/83	478/16672	0.0351715	ACTN2/AR/CIB1/E2F1/TULP3/YWHAH/YWHAQ	7
GO:0048736	appendage development	4/83	168/16672	0.0355966	HDAC1/HDAC2/RARA/TULP3	4
GO:0060173	limb development	4/83	168/16672	0.0355966	HDAC1/HDAC2/RARA/TULP3	4
GO:0030258	lipid modification	5/83	262/16672	0.0356947	LCK/PPARA/PPARD/PPARG/PPARGC1A	5
GO:0014013	regulation of gliogenesis	3/83	90/16672	0.0368239	HDAC1/HDAC2/PPARG	3
GO:0009749	response to glucose	4/83	170/16672	0.0368239	HNF4A/PPARD/PPARGC1A/SRF	4
GO:0030324	lung development	4/83	170/16672	0.0368239	EP300/SRF/THRA/THRB	4
GO:0006874	cellular calcium ion homeostasis	6/83	370/16672	0.0368239	APP/CD38/CD4/ESR1/LCK/VDR	6
GO:0008015	blood circulation	7/83	484/16672	0.0368239	AR/CD38/PPARA/PPARD/PPARG/THRA/THRB	7
GO:0002711	positive regulation of T cell mediated immunity	2/83	31/16672	0.0368239	MAP3K7/TRAF2	2
GO:0002931	response to ischemia	2/83	31/16672	0.0368239	CIB1/PPARGC1A	2
GO:0030224	monocyte differentiation	2/83	31/16672	0.0368239	JUN/PPARG	2
GO:0090207	regulation of triglyceride metabolic process	2/83	31/16672	0.0368239	NR1H2/NR1H3	2
GO:1901224	positive regulation of NIK/NF-kappaB signaling	2/83	31/16672	0.0368239	MAP3K7/TRAF2	2
GO:1903131	mononuclear cell differentiation	2/83	31/16672	0.0368239	JUN/PPARG	2
GO:0008585	female gonad development	3/83	91/16672	0.0372831	ESR1/NR5A1/NRIP1	3
GO:0009135	purine nucleoside diphosphate metabolic process	3/83	91/16672	0.0372831	PPARA/PPARGC1A/STAT3	3
GO:0009179	purine ribonucleoside diphosphate metabolic process	3/83	91/16672	0.0372831	PPARA/PPARGC1A/STAT3	3
GO:0032507	maintenance of protein location in cell	3/83	91/16672	0.0372831	CD4/NR5A1/THRA	3
GO:0003013	circulatory system process	7/83	488/16672	0.0381468	AR/CD38/PPARA/PPARD/PPARG/THRA/THRB	7
GO:0002433	immune response-regulating cell surface receptor signaling pathway involved in phagocytosis	3/83	92/16672	0.0382036	ARPC3/CD247/FCGR3A	3
GO:0038096	Fc-gamma receptor signaling pathway involved in phagocytosis	3/83	92/16672	0.0382036	ARPC3/CD247/FCGR3A	3
GO:0046939	nucleotide phosphorylation	3/83	92/16672	0.0382036	PPARA/PPARGC1A/STAT3	3
GO:0032412	regulation of ion transmembrane transporter activity	4/83	173/16672	0.0382565	ACTN2/FHL1/PPARGC1A/YWHAH	4
GO:0050769	positive regulation of neurogenesis	6/83	375/16672	0.0382963	DNMT3B/HDAC1/HDAC2/PPARG/RARA/SRF	6
GO:0008207	C21-steroid hormone metabolic process	2/83	32/16672	0.0382963	PPARGC1A/REST	2
GO:0032633	interleukin-4 production	2/83	32/16672	0.0382963	CD3E/RARA	2
GO:0033280	response to vitamin D	2/83	32/16672	0.0382963	CD4/VDR	2
GO:0045684	positive regulation of epidermis development	2/83	32/16672	0.0382963	PPARD/VDR	2
GO:0060612	adipose tissue development	2/83	32/16672	0.0382963	PPARD/PPARGC1A	2
GO:0098751	bone cell development	2/83	32/16672	0.0382963	EP300/SRF	2
GO:2000272	negative regulation of receptor activity	2/83	32/16672	0.0382963	CBL/PPARGC1A	2
GO:0009185	ribonucleoside diphosphate metabolic process	3/83	93/16672	0.0387323	PPARA/PPARGC1A/STAT3	3
GO:0042102	positive regulation of T cell proliferation	3/83	93/16672	0.0387323	CD3E/CD4/ZAP70	3
GO:0043200	response to amino acid	3/83	93/16672	0.0387323	DNMT1/DNMT3A/PPARGC1A	3
GO:0009746	response to hexose	4/83	175/16672	0.0391645	HNF4A/PPARD/PPARGC1A/SRF	4
GO:0002244	hematopoietic progenitor cell differentiation	3/83	94/16672	0.0396593	CHD2/REST/SRF	3
GO:0051591	response to cAMP	3/83	94/16672	0.0396593	APP/CARM1/JUN	3
GO:0051899	membrane depolarization	3/83	94/16672	0.0396593	FHL1/JUN/YWHAH	3
GO:0001933	negative regulation of protein phosphorylation	6/83	379/16672	0.0396593	CBL/CIB1/HDAC3/JUN/KAT2B/PPARGC1A	6
GO:0042181	ketone biosynthetic process	2/83	33/16672	0.0398668	PPARGC1A/REST	2
GO:0043268	positive regulation of potassium ion transport	2/83	33/16672	0.0398668	ACTN2/FHL1	2
GO:0044058	regulation of digestive system process	2/83	33/16672	0.0398668	NR1H2/NR1H3	2
GO:0045214	sarcomere organization	2/83	33/16672	0.0398668	ACTN2/SRF	2
GO:0055090	acylglycerol homeostasis	2/83	33/16672	0.0398668	HNF4A/NR1H3	2
GO:0070328	triglyceride homeostasis	2/83	33/16672	0.0398668	HNF4A/NR1H3	2
GO:1901985	positive regulation of protein acetylation	2/83	33/16672	0.0398668	BRCA1/PPARGC1A	2
GO:0097193	intrinsic apoptotic signaling pathway	5/83	274/16672	0.0402484	BRCA1/E2F1/EP300/LCK/TRAF2	5
GO:0030218	erythrocyte differentiation	3/83	95/16672	0.0402484	PRMT1/SRF/THRA	3
GO:0046545	development of primary female sexual characteristics	3/83	95/16672	0.0402484	ESR1/NR5A1/NRIP1	3
GO:0022898	regulation of transmembrane transporter activity	4/83	178/16672	0.0406975	ACTN2/FHL1/PPARGC1A/YWHAH	4
GO:0055074	calcium ion homeostasis	6/83	383/16672	0.0409755	APP/CD38/CD4/ESR1/LCK/VDR	6
GO:0038094	Fc-gamma receptor signaling pathway	3/83	96/16672	0.0412239	ARPC3/CD247/FCGR3A	3
GO:0042886	amide transport	5/83	276/16672	0.0412239	CD38/HDAC1/HNF4A/PPARD/REST	5
GO:0034284	response to monosaccharide	4/83	179/16672	0.0412659	HNF4A/PPARD/PPARGC1A/SRF	4
GO:0043277	apoptotic cell clearance	2/83	34/16672	0.0415926	NR1H3/RARA	2
GO:0090311	regulation of protein deacetylation	2/83	34/16672	0.0415926	CTBP1/EP300	2
GO:1902042	negative regulation of extrinsic apoptotic signaling pathway via death domain receptors	2/83	34/16672	0.0415926	BRCA1/TRAF2	2
GO:2000736	regulation of stem cell differentiation	2/83	34/16672	0.0415926	REST/STAT3	2
GO:0042445	hormone metabolic process	4/83	180/16672	0.0417342	ESR1/NR5A1/PPARGC1A/REST	4
GO:0048738	cardiac muscle tissue development	4/83	180/16672	0.0417342	ACTN2/RARA/RXRA/SRF	4
GO:0052547	regulation of peptidase activity	6/83	386/16672	0.0418855	APP/LCK/PPARG/REST/STAT3/TRAF2	6
GO:0021761	limbic system development	3/83	97/16672	0.0418855	NR0B1/RARA/SRF	3
GO:0044708	single-organism behavior	6/83	387/16672	0.042317	APP/HDAC2/JUN/PPARA/SRF/THRA	6
GO:0002431	Fc receptor mediated stimulatory signaling pathway	3/83	98/16672	0.0428436	ARPC3/CD247/FCGR3A	3
GO:0010906	regulation of glucose metabolic process	3/83	98/16672	0.0428436	KAT2B/PPARA/PPARGC1A	3
GO:0045185	maintenance of protein location	3/83	98/16672	0.0428436	CD4/NR5A1/THRA	3
GO:0006887	exocytosis	6/83	389/16672	0.043103	ACTN2/APP/CD9/PECAM1/REST/ZAP70	6
GO:0001659	temperature homeostasis	2/83	35/16672	0.0433255	PPARGC1A/STAT3	2
GO:0010824	regulation of centrosome duplication	2/83	35/16672	0.0433255	BRCA1/XPO1	2
GO:0031076	embryonic camera-type eye development	2/83	35/16672	0.0433255	RARA/TULP3	2
GO:0032869	cellular response to insulin stimulus	4/83	183/16672	0.0435231	ESRRA/HDAC5/KAT2B/PPARG	4
GO:0071466	cellular response to xenobiotic stimulus	3/83	99/16672	0.0437036	AHR/E2F1/HNF4A	3
GO:0002573	myeloid leukocyte differentiation	4/83	184/16672	0.044217	ESRRA/JUN/PPARG/RARA	4
GO:0032732	positive regulation of interleukin-1 production	2/83	36/16672	0.0454487	HDAC1/HDAC2	2
GO:1901016	regulation of potassium ion transmembrane transporter activity	2/83	36/16672	0.0454487	ACTN2/FHL1	2
GO:0072503	cellular divalent inorganic cation homeostasis	6/83	395/16672	0.0456792	APP/CD38/CD4/ESR1/LCK/VDR	6
GO:0008630	intrinsic apoptotic signaling pathway in response to DNA damage	3/83	101/16672	0.0457717	BRCA1/E2F1/EP300	3
GO:2001237	negative regulation of extrinsic apoptotic signaling pathway	3/83	101/16672	0.0457717	AR/BRCA1/TRAF2	3
GO:0002700	regulation of production of molecular mediator of immune response	3/83	102/16672	0.0466526	MAP3K7/TNFRSF14/TRAF2	3
GO:0006090	pyruvate metabolic process	3/83	102/16672	0.0466526	PPARA/PPARGC1A/STAT3	3
GO:0032680	regulation of tumor necrosis factor production	3/83	102/16672	0.0466526	HDAC1/HDAC2/RARA	3
GO:0034968	histone lysine methylation	3/83	102/16672	0.0466526	BRCA1/DNMT1/DNMT3B	3
GO:0048525	negative regulation of viral process	3/83	102/16672	0.0466526	HDAC1/JUN/REST	3
GO:0050709	negative regulation of protein secretion	3/83	102/16672	0.0466526	HDAC1/NR1H3/REST	3
GO:0046879	hormone secretion	5/83	288/16672	0.046908	CD38/HDAC1/HNF4A/PPARD/REST	5
GO:0046676	negative regulation of insulin secretion	2/83	37/16672	0.0470891	HDAC1/REST	2
GO:0051602	response to electrical stimulus	2/83	37/16672	0.0470891	PPARGC1A/REST	2
GO:0072678	T cell migration	2/83	37/16672	0.0470891	TNFRSF14/ZAP70	2
GO:0097306	cellular response to alcohol	2/83	37/16672	0.0470891	BRCA1/DNMT3A	2
GO:0016358	dendrite development	4/83	189/16672	0.0473762	APP/CARM1/HDAC2/YWHAH	4
GO:0034101	erythrocyte homeostasis	3/83	103/16672	0.0474823	PRMT1/SRF/THRA	3
GO:0030100	regulation of endocytosis	4/83	190/16672	0.0480434	CBL/NR1H2/NR1H3/PPARG	4
GO:0051224	negative regulation of protein transport	4/83	190/16672	0.0480434	HDAC1/NR1H3/REST/THRA	4
GO:0032640	tumor necrosis factor production	3/83	104/16672	0.0484886	HDAC1/HDAC2/RARA	3
GO:0042698	ovulation cycle	3/83	104/16672	0.0484886	ESR1/NR5A1/NRIP1	3
GO:0043281	regulation of cysteine-type endopeptidase activity involved in apoptotic process	4/83	192/16672	0.0495673	LCK/PPARG/REST/TRAF2	4
GO:1903555	regulation of tumor necrosis factor superfamily cytokine production	3/83	105/16672	0.0496208	HDAC1/HDAC2/RARA	3

## Sheet: 3. GO CC terms
Term ID	Term Description	Gene Ratio	Background Ratio	BH adjusted p-value	Annotated Node Genes	Count
GO:0000790	nuclear chromatin	16/84	298/17942	1.09529e-10	AR/DNMT3A/E2F1/ESR1/HDAC1/HDAC2/JUN/NR1H3/NRIP1/PPARD/PPARGC1A/RARA/RXRA/SRF/STAT3/THRB	16
GO:0044454	nuclear chromosome part	19/84	496/17942	1.15557e-10	AR/BRCA1/DNMT3A/E2F1/ESR1/HDAC1/HDAC2/JUN/NR1H3/NRIP1/PPARD/PPARGC1A/RAD21/RARA/RXRA/SRF/STAT3/TEX11/THRB	19
GO:0000785	chromatin	18/84	450/17942	1.60635e-10	AR/DNMT1/DNMT3A/E2F1/ESR1/HDAC1/HDAC2/JUN/NR1H3/NRIP1/PPARD/PPARGC1A/RAD21/RARA/RXRA/SRF/STAT3/THRB	18
GO:0090575	RNA polymerase II transcription factor complex	10/84	102/17942	2.30955e-09	CARM1/E2F1/NR1H3/NR5A1/NR5A2/PPARG/RXRA/STAT3/TAF1/VDR	10
GO:0005667	transcription factor complex	14/84	301/17942	4.83239e-09	AHR/CARM1/CTBP1/E2F1/EP300/JUN/NR1H3/NR5A1/NR5A2/PPARG/RXRA/STAT3/TAF1/VDR	14
GO:0044798	nuclear transcription factor complex	10/84	127/17942	1.3758e-08	CARM1/E2F1/NR1H3/NR5A1/NR5A2/PPARG/RXRA/STAT3/TAF1/VDR	10
GO:0017053	transcriptional repressor complex	7/84	86/17942	4.59438e-06	CTBP1/CTBP2/HDAC1/HDAC2/HDAC3/JUN/REST	7
GO:0043235	receptor complex	11/84	320/17942	7.52411e-06	AHR/APP/CD247/CD3E/CD4/NR1H3/NR3C2/RXRA/TRAF2/VDR/ZAP70	11
GO:0042101	T cell receptor complex	4/84	19/17942	3.85012e-05	CD247/CD3E/CD4/ZAP70	4
GO:0000118	histone deacetylase complex	5/84	60/17942	0.000187733	HDAC1/HDAC2/HDAC3/HDAC5/NRIP1	5
GO:0098589	membrane region	8/84	344/17942	0.00377369	APP/CBL/CD4/LCK/PECAM1/TRAF2/XPO1/ZAP70	8
GO:0042105	alpha-beta T cell receptor complex	2/84	5/17942	0.00377369	CD247/CD3E	2
GO:0045121	membrane raft	7/84	270/17942	0.00420525	APP/CBL/CD4/LCK/PECAM1/TRAF2/ZAP70	7
GO:0098857	membrane microdomain	7/84	271/17942	0.00420525	APP/CBL/CD4/LCK/PECAM1/TRAF2/ZAP70	7
GO:0031091	platelet alpha granule	4/84	74/17942	0.00563876	ACTN2/APP/CD9/PECAM1	4
GO:0001772	immunological synapse	3/84	32/17942	0.00587033	CD3E/LCK/ZAP70	3
GO:0000791	euchromatin	3/84	33/17942	0.00605704	DNMT3A/JUN/PPARGC1A	3
GO:0098552	side of membrane	8/84	426/17942	0.00999981	CD3E/CD4/CD9/FCGR3A/LCK/TNFRSF14/TRAF2/ZAP70	8
GO:0098802	plasma membrane receptor complex	5/84	167/17942	0.012472	CD247/CD3E/CD4/TRAF2/ZAP70	5
GO:0016580	Sin3 complex	2/84	13/17942	0.0164151	HDAC1/HDAC2	2
GO:0031092	platelet alpha granule membrane	2/84	13/17942	0.0164151	CD9/PECAM1	2
GO:0000775	chromosome, centromeric region	5/84	184/17942	0.016534	DNMT1/DNMT3A/KAT2B/RAD21/XPO1	5
GO:0005671	Ada2/Gcn5/Ada3 transcription activator complex	2/84	15/17942	0.0200534	KAT2B/MAP3K7	2
GO:0070822	Sin3-type complex	2/84	16/17942	0.0218967	HDAC1/HDAC2	2
GO:0005665	DNA-directed RNA polymerase II, core complex	2/84	17/17942	0.021992	POLR2A/PPARGC1A	2
GO:0016581	NuRD complex	2/84	17/17942	0.021992	HDAC1/HDAC2	2
GO:0090545	CHD-type complex	2/84	17/17942	0.021992	HDAC1/HDAC2	2
GO:0030426	growth cone	4/84	137/17942	0.02951	APP/ARPC3/CBL/CIB1	4
GO:0030427	site of polarized growth	4/84	142/17942	0.0323623	APP/ARPC3/CBL/CIB1	4
GO:0009897	external side of plasma membrane	5/84	232/17942	0.0328394	CD3E/CD4/CD9/FCGR3A/TNFRSF14	5
GO:0005719	nuclear euchromatin	2/84	25/17942	0.0412394	JUN/PPARGC1A	2

## Sheet: 4. GO MF terms
Term ID	Term Description	Gene Ratio	Background Ratio	BH adjusted p-value	Annotated Node Genes	Count
GO:0004879	RNA polymerase II transcription factor activity, ligand-activated sequence-specific DNA binding	24/83	47/16309	5.63206e-42	AHR/AR/ESR1/ESR2/ESRRA/ESRRB/ESRRG/HNF4A/NR0B1/NR1H2/NR1H3/NR5A1/NR5A2/PPARA/PPARD/PPARG/RARA/RORB/RXRA/RXRB/STAT3/THRA/THRB/VDR	24
GO:0098531	transcription factor activity, direct ligand regulated sequence-specific DNA binding	24/83	47/16309	5.63206e-42	AHR/AR/ESR1/ESR2/ESRRA/ESRRB/ESRRG/HNF4A/NR0B1/NR1H2/NR1H3/NR5A1/NR5A2/PPARA/PPARD/PPARG/RARA/RORB/RXRA/RXRB/STAT3/THRA/THRB/VDR	24
GO:0003707	steroid hormone receptor activity	25/83	59/16309	2.46324e-41	AR/ESR1/ESR2/ESRRA/ESRRB/ESRRG/HNF4A/NR0B1/NR1H2/NR1H3/NR2C1/NR3C1/NR3C2/NR5A1/NR5A2/PPARA/PPARD/PPARG/RARA/RORB/RXRA/RXRB/THRA/THRB/VDR	25
GO:0008134	transcription factor binding	31/83	498/16309	4.76874e-24	AHR/AR/CTBP1/CTBP2/E2F1/EP300/ESR1/ESRRB/HDAC1/HDAC2/HDAC3/HDAC5/HNF4A/JUN/KAT2B/NR0B1/NR1H2/NRIP1/PPARA/PPARD/PPARG/PPARGC1A/RARA/REST/RORB/RXRA/SRF/STAT3/TAF1/THRA/VDR	31
GO:0003682	chromatin binding	26/83	474/16309	1.93676e-18	AR/CTBP2/DNMT1/DNMT3A/DNMT3B/EP300/ESR1/HDAC1/HDAC2/HDAC3/HDAC5/JUN/KAT2B/NR5A1/NR5A2/PHF8/PPARG/PPARGC1A/RAD21/RARA/REST/RXRA/SRF/STAT3/THRA/THRB	26
GO:0003713	transcription coactivator activity	19/83	290/16309	1.56525e-14	ACTN2/BRCA1/CARM1/CTBP2/EP300/ESR2/ESRRB/JUN/KAT2B/NR1H3/NR5A1/NRIP1/PPARD/PPARG/PPARGC1A/RARA/RXRA/RXRB/TAF1	19
GO:0035257	nuclear hormone receptor binding	13/83	127/16309	3.23552e-12	BRCA1/CTBP2/EP300/NR0B1/NR1H2/NRIP1/PPARG/PPARGC1A/RXRA/STAT3/VDR/YWHAH/ZNF366	13
GO:0051427	hormone receptor binding	13/83	148/16309	2.08746e-11	BRCA1/CTBP2/EP300/NR0B1/NR1H2/NRIP1/PPARG/PPARGC1A/RXRA/STAT3/VDR/YWHAH/ZNF366	13
GO:0001228	transcriptional activator activity, RNA polymerase II transcription regulatory region sequence-specific binding	16/83	319/16309	1.82139e-10	AR/EP300/ESR1/ESRRA/ESRRG/HNF4A/JUN/NR1H2/NR3C1/NR5A2/PPARA/RAD21/REST/RXRB/SRF/STAT3	16
GO:0001047	core promoter binding	12/83	155/16309	6.28177e-10	CHD2/E2F1/EP300/ESR1/ESR2/HDAC1/HDAC2/HDAC5/HNF4A/NRIP1/PPARG/REST	12
GO:0005496	steroid binding	10/83	88/16309	6.50727e-10	AR/ESR1/ESR2/ESRRA/ESRRB/ESRRG/NR1H3/NR3C1/NR3C2/VDR	10
GO:0031490	chromatin DNA binding	10/83	97/16309	1.60201e-09	EP300/HDAC1/HDAC2/PPARGC1A/RARA/RXRA/SRF/STAT3/THRA/THRB	10
GO:0043566	structure-specific DNA binding	11/83	134/16309	1.87316e-09	EP300/HDAC1/HDAC2/NR0B1/PPARGC1A/RARA/RXRA/SRF/STAT3/THRA/THRB	11
GO:0035258	steroid hormone receptor binding	9/83	77/16309	4.1893e-09	BRCA1/EP300/NR0B1/NRIP1/PPARG/PPARGC1A/STAT3/YWHAH/ZNF366	9
GO:0042826	histone deacetylase binding	9/83	104/16309	5.96151e-08	DNMT3B/HDAC1/HDAC3/HDAC5/KAT2B/NR2C1/NRIP1/RARA/SRF	9
GO:0000982	transcription factor activity, RNA polymerase II core promoter proximal region sequence-specific binding	13/83	336/16309	2.83238e-07	AR/ESR1/ESRRA/HNF4A/JUN/NR1H2/NR2C1/NR3C1/NR5A2/PPARA/REST/SRF/STAT3	13
GO:0000978	RNA polymerase II core promoter proximal region sequence-specific DNA binding	13/83	348/16309	3.93122e-07	AR/ESR1/ESRRA/HDAC1/HDAC2/JUN/NR1H2/NR2C1/NR3C1/NR5A2/PPARA/SRF/STAT3	13
GO:0003708	retinoic acid receptor activity	4/83	7/16309	3.93122e-07	ESRRG/RARA/RXRA/RXRB	4
GO:0001077	transcriptional activator activity, RNA polymerase II core promoter proximal region sequence-specific binding	11/83	230/16309	3.94733e-07	AR/ESR1/ESRRA/HNF4A/JUN/NR1H2/NR3C1/NR5A2/PPARA/SRF/STAT3	11
GO:0000987	core promoter proximal region sequence-specific DNA binding	13/83	367/16309	6.42348e-07	AR/ESR1/ESRRA/HDAC1/HDAC2/JUN/NR1H2/NR2C1/NR3C1/NR5A2/PPARA/SRF/STAT3	13
GO:0001159	core promoter proximal region DNA binding	13/83	370/16309	6.73037e-07	AR/ESR1/ESRRA/HDAC1/HDAC2/JUN/NR1H2/NR2C1/NR3C1/NR5A2/PPARA/SRF/STAT3	13
GO:0001046	core promoter sequence-specific DNA binding	8/83	103/16309	7.31154e-07	CHD2/EP300/ESR1/ESR2/HNF4A/NRIP1/PPARG/REST	8
GO:0001085	RNA polymerase II transcription factor binding	8/83	103/16309	7.31154e-07	AR/EP300/HDAC1/HDAC2/HNF4A/JUN/PPARA/STAT3	8
GO:0042974	retinoic acid receptor binding	5/83	24/16309	1.62694e-06	CTBP2/NR1H2/NRIP1/PPARG/VDR	5
GO:0003714	transcription corepressor activity	10/83	220/16309	2.19824e-06	CTBP1/CTBP2/DNMT3B/HDAC1/HDAC3/NR0B1/NRIP1/RARA/THRB/ZNF366	10
GO:0031078	histone deacetylase activity (H3-K14 specific)	4/83	12/16309	3.63534e-06	HDAC1/HDAC2/HDAC3/HDAC5	4
GO:0032041	NAD-dependent histone deacetylase activity (H3-K14 specific)	4/83	12/16309	3.63534e-06	HDAC1/HDAC2/HDAC3/HDAC5	4
GO:0001076	transcription factor activity, RNA polymerase II transcription factor binding	8/83	137/16309	5.49202e-06	CTBP1/HDAC1/JUN/NR3C1/PPARA/PPARGC1A/SRF/TAF1	8
GO:0035326	enhancer binding	7/83	95/16309	5.95597e-06	AHR/ESRRB/HDAC1/HDAC2/JUN/NR5A1/NR5A2	7
GO:0070491	repressing transcription factor binding	6/83	60/16309	6.35696e-06	CTBP1/HDAC1/HDAC2/HDAC5/PPARA/STAT3	6
GO:0046965	retinoid X receptor binding	4/83	15/16309	8.63017e-06	NR1H2/NRIP1/PPARG/VDR	4
GO:0000980	RNA polymerase II distal enhancer sequence-specific DNA binding	6/83	65/16309	9.63559e-06	ESRRB/HDAC1/HDAC2/JUN/NR5A1/NR5A2	6
GO:0017136	NAD-dependent histone deacetylase activity	4/83	16/16309	1.0451e-05	HDAC1/HDAC2/HDAC3/HDAC5	4
GO:0034979	NAD-dependent protein deacetylase activity	4/83	16/16309	1.0451e-05	HDAC1/HDAC2/HDAC3/HDAC5	4
GO:0004407	histone deacetylase activity	5/83	41/16309	1.78698e-05	HDAC1/HDAC2/HDAC3/HDAC5/REST	5
GO:0033558	protein deacetylase activity	5/83	41/16309	1.78698e-05	HDAC1/HDAC2/HDAC3/HDAC5/REST	5
GO:0009008	DNA-methyltransferase activity	3/83	6/16309	2.22882e-05	DNMT1/DNMT3A/DNMT3B	3
GO:0001158	enhancer sequence-specific DNA binding	6/83	82/16309	3.21113e-05	ESRRB/HDAC1/HDAC2/JUN/NR5A1/NR5A2	6
GO:0019213	deacetylase activity	5/83	53/16309	6.02168e-05	HDAC1/HDAC2/HDAC3/HDAC5/REST	5
GO:0033613	activating transcription factor binding	5/83	56/16309	7.72222e-05	EP300/HDAC1/HNF4A/JUN/PPARG	5
GO:0001103	RNA polymerase II repressing transcription factor binding	4/83	27/16309	8.00829e-05	HDAC1/HDAC2/PPARA/STAT3	4
GO:0051059	NF-kappaB binding	4/83	28/16309	9.08529e-05	HDAC1/HDAC2/HDAC3/PPARD	4
GO:0035259	glucocorticoid receptor binding	3/83	11/16309	0.000155334	NRIP1/STAT3/YWHAH	3
GO:0030331	estrogen receptor binding	4/83	36/16309	0.000241887	NRIP1/PPARG/PPARGC1A/ZNF366	4
GO:0050681	androgen receptor binding	4/83	39/16309	0.000326438	BRCA1/EP300/NRIP1/PPARGC1A	4
GO:0016811	hydrolase activity, acting on carbon-nitrogen (but not peptide) bonds, in linear amides	5/83	83/16309	0.000458427	HDAC1/HDAC2/HDAC3/HDAC5/REST	5
GO:0003705	transcription factor activity, RNA polymerase II distal enhancer sequence-specific binding	5/83	90/16309	0.000660527	HNF4A/JUN/NR5A1/NR5A2/SRF	5
GO:0030374	ligand-dependent nuclear receptor transcription coactivator activity	4/83	51/16309	0.000869554	ACTN2/CARM1/PPARG/PPARGC1A	4
GO:0033293	monocarboxylic acid binding	4/83	51/16309	0.000869554	HNF4A/PPARD/PPARG/RARA	4
GO:0005504	fatty acid binding	3/83	24/16309	0.0015622	HNF4A/PPARD/PPARG	3
GO:0030284	estrogen receptor activity	2/83	5/16309	0.00160178	ESR1/ESR2	2
GO:0044325	ion channel binding	5/83	111/16309	0.00160178	ACTN2/CIB1/FHL1/YWHAH/YWHAQ	5
GO:0042562	hormone binding	4/83	64/16309	0.00194397	AR/NR3C1/THRA/THRB	4
GO:0004468	lysine N-acetyltransferase activity, acting on acetyl phosphate as donor	2/83	6/16309	0.00225895	EP300/KAT2B	2
GO:0070324	thyroid hormone binding	2/83	6/16309	0.00225895	THRA/THRB	2
GO:0008536	Ran GTPase binding	3/83	29/16309	0.00247234	CSE1L/KPNB1/XPO1	3
GO:0004887	thyroid hormone receptor activity	2/83	7/16309	0.00298904	THRA/THRB	2
GO:0035242	protein-arginine omega-N asymmetric methyltransferase activity	2/83	7/16309	0.00298904	CARM1/PRMT1	2
GO:0051117	ATPase binding	4/83	74/16309	0.00304283	AR/ESR1/LCK/NR1H2	4
GO:0005049	nuclear export signal receptor activity	2/83	8/16309	0.00377686	CSE1L/XPO1	2
GO:0008469	histone-arginine N-methyltransferase activity	2/83	8/16309	0.00377686	CARM1/PRMT1	2
GO:0016810	hydrolase activity, acting on carbon-nitrogen (but not peptide) bonds	5/83	141/16309	0.00401084	HDAC1/HDAC2/HDAC3/HDAC5/REST	5
GO:0008013	beta-catenin binding	4/83	81/16309	0.00401084	AR/CARM1/EP300/ESR1	4
GO:0001191	transcriptional repressor activity, RNA polymerase II transcription factor binding	4/83	82/16309	0.00408961	CTBP1/HDAC1/JUN/PPARA	4
GO:0008757	S-adenosylmethionine-dependent methyltransferase activity	5/83	143/16309	0.00408961	CARM1/DNMT1/DNMT3A/DNMT3B/PRMT1	5
GO:0001102	RNA polymerase II activating transcription factor binding	3/83	37/16309	0.00433184	EP300/HNF4A/JUN	3
GO:0019902	phosphatase binding	5/83	152/16309	0.00521718	LCK/PPARA/PPARG/STAT3/TRAF2	5
GO:0016273	arginine N-methyltransferase activity	2/83	10/16309	0.00525464	CARM1/PRMT1	2
GO:0016274	protein-arginine N-methyltransferase activity	2/83	10/16309	0.00525464	CARM1/PRMT1	2
GO:0036041	long-chain fatty acid binding	2/83	10/16309	0.00525464	PPARD/PPARG	2
GO:0008144	drug binding	4/83	99/16309	0.00751404	PPARA/PPARD/PPARG/RARA	4
GO:0001227	transcriptional repressor activity, RNA polymerase II transcription regulatory region sequence-specific binding	5/83	173/16309	0.00860403	ESRRA/NR2C1/PPARA/PPARD/REST	5
GO:0008022	protein C-terminus binding	5/83	174/16309	0.00870283	CIB1/CTBP1/EP300/LCK/YWHAQ	5
GO:0001078	transcriptional repressor activity, RNA polymerase II core promoter proximal region sequence-specific binding	4/83	108/16309	0.00978739	ESRRA/NR2C1/PPARA/REST	4
GO:0001784	phosphotyrosine binding	2/83	14/16309	0.00978739	CBL/ZAP70	2
GO:0019903	protein phosphatase binding	4/83	110/16309	0.0103207	LCK/PPARG/STAT3/TRAF2	4
GO:0004402	histone acetyltransferase activity	3/83	57/16309	0.012997	EP300/KAT2B/TAF1	3
GO:0061733	peptide-lysine-N-acetyltransferase activity	3/83	58/16309	0.0134809	EP300/KAT2B/TAF1	3
GO:0070577	lysine-acetylated histone binding	2/83	17/16309	0.0137498	CARM1/TAF1	2
GO:0000983	transcription factor activity, RNA polymerase II core promoter sequence-specific	2/83	19/16309	0.0167507	SRF/TAF1	2
GO:1990841	promoter-specific chromatin binding	2/83	19/16309	0.0167507	DNMT1/PPARGC1A	2
GO:0008168	methyltransferase activity	5/83	209/16309	0.0170416	CARM1/DNMT1/DNMT3A/DNMT3B/PRMT1	5
GO:0017025	TBP-class protein binding	2/83	20/16309	0.0180313	TAF1/THRA	2
GO:0034212	peptide N-acetyltransferase activity	3/83	66/16309	0.0180313	EP300/KAT2B/TAF1	3
GO:0008327	methyl-CpG binding	2/83	21/16309	0.0192478	DNMT1/PRMT1	2
GO:0051393	alpha-actinin binding	2/83	21/16309	0.0192478	PPARG/RARA	2
GO:0016741	transferase activity, transferring one-carbon groups	5/83	221/16309	0.020309	CARM1/DNMT1/DNMT3A/DNMT3B/PRMT1	5
GO:0019865	immunoglobulin binding	2/83	23/16309	0.0222602	CD4/FCGR3A	2
GO:0045309	protein phosphorylated amino acid binding	2/83	23/16309	0.0222602	CBL/ZAP70	2
GO:0031406	carboxylic acid binding	4/83	149/16309	0.0256449	HNF4A/PPARD/PPARG/RARA	4
GO:0001106	RNA polymerase II transcription corepressor activity	2/83	25/16309	0.0256461	CTBP1/HDAC1	2
GO:0046982	protein heterodimerization activity	7/83	453/16309	0.0291682	AHR/CD3E/JUN/PPARD/RARA/RXRA/YWHAH	7
GO:0051879	Hsp90 protein binding	2/83	27/16309	0.0291682	AHR/KPNB1	2
GO:0031072	heat shock protein binding	3/83	82/16309	0.0294231	AHR/HDAC2/KPNB1	3
GO:0030291	protein serine/threonine kinase inhibitor activity	2/83	29/16309	0.0324703	CIB1/KAT2B	2
GO:0042805	actinin binding	2/83	29/16309	0.0324703	PPARG/RARA	2
GO:0008080	N-acetyltransferase activity	3/83	86/16309	0.0324754	EP300/KAT2B/TAF1	3
GO:0005487	nucleocytoplasmic transporter activity	2/83	30/16309	0.0339679	CSE1L/XPO1	2
GO:0001104	RNA polymerase II transcription cofactor activity	3/83	89/16309	0.0349275	CTBP1/HDAC1/PPARGC1A	3
GO:0043548	phosphatidylinositol 3-kinase binding	2/83	31/16309	0.0354677	CBL/LCK	2
GO:0008565	protein transporter activity	3/83	96/16309	0.0419966	CSE1L/KPNB1/XPO1	3
GO:0031625	ubiquitin protein ligase binding	5/83	275/16309	0.0421978	BRCA1/POLR2A/PPARGC1A/TNFRSF14/TRAF2	5
GO:0044389	ubiquitin-like protein ligase binding	5/83	281/16309	0.0455069	BRCA1/POLR2A/PPARGC1A/TNFRSF14/TRAF2	5
GO:0042393	histone binding	4/83	184/16309	0.0455283	CARM1/CHD2/PHF8/TAF1	4
GO:0016407	acetyltransferase activity	3/83	102/16309	0.0475041	EP300/KAT2B/TAF1	3
GO:0016410	N-acyltransferase activity	3/83	103/16309	0.048293	EP300/KAT2B/TAF1	3

## Sheet: 5. DO terms
Term ID	Term Description	Gene Ratio	Background Ratio	BH adjusted p-value	Annotated Node Genes	Count
DOID:657	adenoma	18/86	340/8007	4.5976e-06	AHR/AR/BRCA1/CTBP1/DNMT3B/ESR1/ESR2/HDAC2/JUN/NR0B1/NR5A1/PECAM1/PPARD/PPARG/RARA/STAT3/THRA/VDR	18
DOID:2237	hepatitis	20/86	431/8007	4.5976e-06	AR/CBL/CD4/DNMT1/DNMT3A/E2F1/ESR1/FCGR3A/HDAC3/HNF4A/JUN/LCK/NR5A2/PPARA/PPARG/PPARGC1A/RXRA/STAT3/VDR/XPO1	20
DOID:0060084	cell type benign neoplasm	20/86	475/8007	1.5538e-05	AHR/AR/BRCA1/CTBP1/DNMT3B/ESR1/ESR2/HDAC2/JUN/NR0B1/NR5A1/PECAM1/PPARD/PPARG/RARA/RXRA/SRF/STAT3/THRA/VDR	20
DOID:2043	hepatitis B	13/86	197/8007	1.85896e-05	AR/DNMT1/DNMT3A/ESR1/HDAC3/HNF4A/JUN/NR5A2/PPARG/PPARGC1A/RXRA/VDR/XPO1	13
DOID:9970	obesity	15/86	313/8007	9.71346e-05	APP/AR/ESR1/ESR2/NR1H2/NR1H3/NR3C1/PPARA/PPARD/PPARG/PPARGC1A/RARA/STAT3/TNFRSF14/VDR	15
DOID:654	overnutrition	15/86	322/8007	0.000115767	APP/AR/ESR1/ESR2/NR1H2/NR1H3/NR3C1/PPARA/PPARD/PPARG/PPARGC1A/RARA/STAT3/TNFRSF14/VDR	15
DOID:374	nutrition disease	15/86	338/8007	0.000181918	APP/AR/ESR1/ESR2/NR1H2/NR1H3/NR3C1/PPARA/PPARD/PPARG/PPARGC1A/RARA/STAT3/TNFRSF14/VDR	15
DOID:3996	urinary system cancer	18/86	500/8007	0.000278372	AR/CD3E/DNMT1/DNMT3B/E2F1/ESR1/HDAC2/HNF4A/LCK/NR0B1/NR3C2/PECAM1/PPARA/PPARD/PPARG/RXRA/STAT3/VDR	18
DOID:0050736	autosomal dominant disease	15/86	409/8007	0.00141805	AHR/AR/BRCA1/CBL/CTBP1/EP300/ESR1/ESR2/FHL1/HDAC1/NR1H3/PPARGC1A/REST/STAT3/XPO1	15
DOID:3308	embryonal carcinoma	4/86	21/8007	0.0027586	DNMT1/HDAC1/MIR302B/NRIP1	4
DOID:127	leiomyoma	7/86	95/8007	0.0027586	AR/ESR1/ESR2/PECAM1/PPARG/RXRA/SRF	7
DOID:1936	atherosclerosis	13/86	344/8007	0.0027586	AHR/AR/ESR1/ESR2/FCGR3A/HDAC5/MIR27B/NR1H3/PECAM1/PPARA/PPARG/PPARGC1A/TNFRSF14	13
DOID:2348	arteriosclerotic cardiovascular disease	13/86	345/8007	0.0027586	AHR/AR/ESR1/ESR2/FCGR3A/HDAC5/MIR27B/NR1H3/PECAM1/PPARA/PPARG/PPARGC1A/TNFRSF14	13
DOID:28	endocrine system disease	14/86	399/8007	0.00284303	AR/CD4/ESR2/HNF4A/NR0B1/NR3C1/NR3C2/NR5A1/PPARA/PPARG/PPARGC1A/THRA/THRB/VDR	14
DOID:10892	hypospadias	4/86	23/8007	0.00308516	AR/ESR1/ESR2/NR5A1	4
DOID:2349	arteriosclerosis	13/86	356/8007	0.00308516	AHR/AR/ESR1/ESR2/FCGR3A/HDAC5/MIR27B/NR1H3/PECAM1/PPARA/PPARG/PPARGC1A/TNFRSF14	13
DOID:5683	hereditary breast ovarian cancer	10/86	222/8007	0.00352521	AHR/AR/BRCA1/CTBP1/EP300/ESR1/ESR2/HDAC1/NR1H3/XPO1	10
DOID:0060118	thoracic disease	4/86	25/8007	0.00352521	AR/BRCA1/ESR1/ESR2	4
DOID:3463	breast disease	4/86	25/8007	0.00352521	AR/BRCA1/ESR1/ESR2	4
DOID:3459	breast carcinoma	13/86	383/8007	0.00496985	BRCA1/DNMT3A/DNMT3B/E2F1/ESR1/ESR2/ESRRA/MAP3K7/PPARG/SRF/STAT3/VDR/ZAP70	13
DOID:263	kidney cancer	14/86	437/8007	0.00496985	AR/CD3E/E2F1/ESR1/HDAC2/HNF4A/LCK/NR0B1/NR3C2/PECAM1/PPARG/RXRA/STAT3/VDR	14
DOID:10211	cholelithiasis	4/86	29/8007	0.0055321	AR/ESR1/ESR2/NR1H3	4
DOID:1205	hypersensitivity reaction type I disease	7/86	122/8007	0.00701914	AHR/APP/BRCA1/ESR1/NR3C1/STAT3/VDR	7
DOID:557	kidney disease	14/86	461/8007	0.00754384	CD247/CD4/ESR1/JUN/NR3C1/NR3C2/PECAM1/PPARA/PPARG/RARA/RXRA/STAT3/TRAF2/VDR	14
DOID:11383	cryptorchidism	3/86	15/8007	0.00966944	AR/ESR1/NR5A1	3
DOID:3948	adrenocortical carcinoma	3/86	15/8007	0.00966944	ESR2/NR0B1/NR5A1	3
DOID:18	urinary system disease	14/86	478/8007	0.0096707	CD247/CD4/ESR1/JUN/NR3C1/NR3C2/PECAM1/PPARA/PPARG/RARA/RXRA/STAT3/TRAF2/VDR	14
DOID:7998	hyperthyroidism	6/86	96/8007	0.00968098	ESR2/PPARA/PPARG/THRA/THRB/VDR	6
DOID:10283	prostate cancer	13/86	425/8007	0.00968098	AR/BRCA1/CARM1/ESR1/JUN/NR1H3/PPARG/PPARGC1A/RAD21/RARA/RXRA/RXRB/VDR	13
DOID:0060262	gallbladder disease	4/86	37/8007	0.0105672	AR/ESR1/ESR2/NR1H3	4
DOID:3856	male reproductive organ cancer	13/86	435/8007	0.0110169	AR/BRCA1/CARM1/ESR1/JUN/NR1H3/PPARG/PPARGC1A/RAD21/RARA/RXRA/RXRB/VDR	13
DOID:4451	renal carcinoma	12/86	380/8007	0.0110169	AR/CD3E/E2F1/ESR1/HDAC2/LCK/NR3C2/PECAM1/PPARG/RXRA/STAT3/VDR	12
DOID:660	adrenal cortex cancer	3/86	18/8007	0.0133482	ESR2/NR0B1/NR5A1	3
DOID:4905	pancreatic carcinoma	9/86	237/8007	0.0141209	BRCA1/DNMT1/E2F1/EP300/HDAC1/HDAC2/JUN/STAT3/TRAF2	9
DOID:1307	dementia	7/86	150/8007	0.0150513	APP/DNMT1/E2F1/ESR1/ESR2/MIR659/PPARG	7
DOID:0060095	uterine benign neoplasm	4/86	43/8007	0.0150513	AR/ESR1/ESR2/PECAM1	4
DOID:13223	uterine fibroid	4/86	43/8007	0.0150513	AR/ESR1/ESR2/PECAM1	4
DOID:184	bone cancer	9/86	243/8007	0.0150513	AR/CD9/ESR1/ESR2/JUN/RARA/STAT3/VDR/XPO1	9
DOID:612	primary immunodeficiency disease	8/86	196/8007	0.0150513	CD3E/CD4/DNMT3B/FCGR3A/HDAC1/VDR/XPO1/ZAP70	8
DOID:0060086	female reproductive organ benign neoplasm	4/86	45/8007	0.0167503	AR/ESR1/ESR2/PECAM1	4
DOID:3953	adrenal gland cancer	3/86	21/8007	0.0171086	ESR2/NR0B1/NR5A1	3
DOID:0050622	reproductive organ benign neoplasm	4/86	47/8007	0.0183313	AR/ESR1/ESR2/PECAM1	4
DOID:4074	pancreas adenocarcinoma	7/86	161/8007	0.0183313	BRCA1/EP300/HDAC1/HDAC2/JUN/STAT3/TRAF2	7
DOID:12705	Friedreich ataxia	2/86	6/8007	0.0183313	PPARG/PPARGC1A	2
DOID:2733	skin atrophy	2/86	6/8007	0.0183313	APP/RXRA	2
DOID:4411	hepatitis E	2/86	6/8007	0.0183313	CBL/STAT3	2
DOID:0060085	organ system benign neoplasm	9/86	262/8007	0.0203306	AHR/AR/BRCA1/ESR1/ESR2/NR0B1/NR5A1/PECAM1/STAT3	9
DOID:10286	prostate carcinoma	6/86	122/8007	0.0203306	AR/CARM1/ESR1/PPARG/RAD21/RXRA	6
DOID:11612	polycystic ovary syndrome	7/86	166/8007	0.0203306	AR/ESR1/ESR2/NRIP1/PPARG/PPARGC1A/VDR	7
DOID:688	embryonal cancer	11/86	373/8007	0.0203306	AR/CD247/CD4/DNMT1/HDAC1/HDAC3/JUN/MIR302B/NRIP1/RXRA/XPO1	11
DOID:3908	non-small cell lung carcinoma	12/86	431/8007	0.0203306	AHR/BRCA1/CD3E/DNMT1/DNMT3B/E2F1/ESR1/ESR2/NR0B1/PPARG/STAT3/VDR	12
DOID:3347	osteosarcoma	8/86	215/8007	0.0203306	CD9/ESR1/ESR2/JUN/RARA/STAT3/VDR/XPO1	8
DOID:987	alopecia	4/86	52/8007	0.0216983	AR/NR3C2/PPARG/VDR	4
DOID:1614	male breast cancer	2/86	7/8007	0.0217093	BRCA1/ESR1	2
DOID:104	bacterial infectious disease	9/86	271/8007	0.0217502	CD247/CD38/JUN/LCK/PECAM1/PPARG/STAT3/VDR/ZAP70	9
DOID:0060100	musculoskeletal system cancer	12/86	439/8007	0.0217502	AR/BRCA1/CD9/ESR1/ESR2/JUN/KAT2B/PPARG/RARA/STAT3/VDR/XPO1	12
DOID:9455	lipid storage disease	6/86	130/8007	0.0236135	JUN/NR1H3/PPARA/PPARG/PPARGC1A/VDR	6
DOID:438	autoimmune disease of the nervous system	4/86	55/8007	0.0239639	ESR1/ESR2/NR3C1/YWHAQ	4
DOID:5183	hereditary Wilms' tumor	4/86	55/8007	0.0239639	AR/ESR1/HNF4A/NR0B1	4
DOID:3910	lung adenocarcinoma	7/86	178/8007	0.0247137	AHR/BRCA1/CD3E/E2F1/ESR1/ESR2/NR0B1	7
DOID:120	female reproductive organ cancer	12/86	455/8007	0.0267539	AR/BRCA1/CD4/ESR1/ESR2/JUN/MIR20B/PPARD/PPARG/PPARGC1A/STAT3/VDR	12
DOID:3717	gastric adenocarcinoma	5/86	94/8007	0.0267539	CDK8/ESR2/JUN/PPARG/STAT3	5
DOID:0080015	physical disorder	6/86	136/8007	0.0267539	AR/BRCA1/ESR1/ESR2/MIR140/NR5A1	6
DOID:9452	fatty liver disease	5/86	95/8007	0.0267806	JUN/NR1H3/PPARA/PPARG/PPARGC1A	5
DOID:4450	renal cell carcinoma	10/86	342/8007	0.0267806	AR/CD3E/E2F1/ESR1/NR3C2/PECAM1/PPARG/RXRA/STAT3/VDR	10
DOID:9834	hyperopia	3/86	29/8007	0.0267806	CBL/CD247/RARA	3
DOID:1428	endocrine pancreas disease	4/86	59/8007	0.0267806	HNF4A/NR3C2/PPARG/PPARGC1A	4
DOID:4535	hypotrichosis	4/86	59/8007	0.0267806	AR/NR3C2/PPARG/VDR	4
DOID:4007	bladder carcinoma	4/86	60/8007	0.0267806	DNMT1/DNMT3B/PPARA/PPARD	4
DOID:4606	bile duct cancer	6/86	140/8007	0.0267806	DNMT1/DNMT3B/ESR1/ESR2/PPARD/PPARG	6
DOID:4897	bile duct carcinoma	6/86	140/8007	0.0267806	DNMT1/DNMT3B/ESR1/ESR2/PPARD/PPARG	6
DOID:0050338	primary bacterial infectious disease	8/86	238/8007	0.0267806	CD247/CD38/JUN/LCK/PECAM1/PPARG/VDR/ZAP70	8
DOID:10688	hypertrophy of breast	2/86	9/8007	0.0267806	AR/BRCA1	2
DOID:14447	gonadal dysgenesis	2/86	9/8007	0.0267806	AR/NR5A1	2
DOID:2994	germ cell cancer	11/86	410/8007	0.0286114	AR/CD247/CD4/DNMT1/HDAC1/HDAC3/JUN/MIR302B/NRIP1/RXRA/XPO1	11
DOID:421	hair disease	4/86	65/8007	0.0340536	AR/NR3C2/PPARG/VDR	4
DOID:3211	lysosomal storage disease	6/86	150/8007	0.03536	JUN/NR1H3/PPARA/PPARG/PPARGC1A/VDR	6
DOID:11981	morbid obesity	3/86	34/8007	0.0365953	ESR1/ESR2/PPARG	3
DOID:4465	papillary renal cell carcinoma	2/86	11/8007	0.0369778	CD3E/PECAM1	2
DOID:656	adrenal adenoma	2/86	11/8007	0.0369778	NR0B1/NR5A1	2
DOID:5517	stomach carcinoma	6/86	153/8007	0.0369778	CD247/CDK8/ESR2/JUN/PPARG/STAT3	6
DOID:201	connective tissue cancer	10/86	370/8007	0.0374799	AR/CD9/ESR1/ESR2/JUN/PPARG/RARA/STAT3/VDR/XPO1	10
DOID:2277	gonadal disease	4/86	70/8007	0.0405538	AR/NR0B1/NR3C1/NR5A1	4
DOID:1793	pancreatic cancer	9/86	319/8007	0.0413713	BRCA1/DNMT1/E2F1/EP300/HDAC1/HDAC2/JUN/STAT3/TRAF2	9
DOID:3382	liposarcoma	2/86	12/8007	0.0413713	JUN/PPARG	2
DOID:3939	lipomatous cancer	2/86	12/8007	0.0413713	JUN/PPARG	2
DOID:50	thyroid gland disease	6/86	159/8007	0.0413713	ESR2/PPARA/PPARG/THRA/THRB/VDR	6
DOID:1924	hypogonadism	3/86	39/8007	0.0476692	AR/NR0B1/NR5A1	3

## Sheet: 6. KEGG terms
Term ID	Term Description	Gene Ratio	Background Ratio	BH adjusted p-value	Annotated Node Genes	Count
hsa04659	Th17 cell differentiation	11/69	107/7197	5.5919e-07	AHR/CD247/CD3E/CD4/JUN/LCK/RARA/RXRA/RXRB/STAT3/ZAP70	11
hsa05169	Epstein-Barr virus infection	13/69	204/7197	3.35761e-06	CD38/EP300/HDAC1/HDAC2/HDAC5/JUN/MAP3K7/POLR2A/STAT3/TRAF2/XPO1/YWHAH/YWHAQ	13
hsa04919	Thyroid hormone signaling pathway	10/69	118/7197	6.48603e-06	EP300/ESR1/HDAC1/HDAC2/HDAC3/KAT2B/RXRA/RXRB/THRA/THRB	10
hsa05203	Viral carcinogenesis	12/69	203/7197	1.32801e-05	EP300/HDAC1/HDAC2/HDAC3/HDAC5/JUN/KAT2B/SRF/STAT3/TRAF2/YWHAH/YWHAQ	12
hsa05200	Pathways in cancer	16/69	397/7197	1.89115e-05	AR/CBL/CTBP1/CTBP2/E2F1/EP300/HDAC1/HDAC2/JUN/PPARD/PPARG/RARA/RXRA/RXRB/STAT3/TRAF2	16
hsa04330	Notch signaling pathway	6/69	48/7197	0.000121203	CTBP1/CTBP2/EP300/HDAC1/HDAC2/KAT2B	6
hsa04660	T cell receptor signaling pathway	8/69	105/7197	0.000121203	CBL/CD247/CD3E/CD4/JUN/LCK/MAP3K7/ZAP70	8
hsa05206	MicroRNAs in cancer	12/69	299/7197	0.000375695	BRCA1/DNMT1/DNMT3A/DNMT3B/E2F1/EP300/HDAC1/MIR192/MIR20A/MIR215/MIR27B/STAT3	12
hsa04920	Adipocytokine signaling pathway	6/69	70/7197	0.000756108	PPARA/PPARGC1A/RXRA/RXRB/STAT3/TRAF2	6
hsa03320	PPAR signaling pathway	6/69	72/7197	0.000785279	NR1H3/PPARA/PPARD/PPARG/RXRA/RXRB	6
hsa05220	Chronic myeloid leukemia	6/69	73/7197	0.000785279	CBL/CTBP1/CTBP2/E2F1/HDAC1/HDAC2	6
hsa04110	Cell cycle	7/69	124/7197	0.00190416	E2F1/EP300/HDAC1/HDAC2/RAD21/YWHAH/YWHAQ	7
hsa04658	Th1 and Th2 cell differentiation	6/69	92/7197	0.00241321	CD247/CD3E/CD4/JUN/LCK/ZAP70	6
hsa05340	Primary immunodeficiency	4/69	37/7197	0.00388257	CD3E/CD4/LCK/ZAP70	4
hsa04380	Osteoclast differentiation	6/69	132/7197	0.0142287	FCGR3A/JUN/LCK/MAP3K7/PPARG/TRAF2	6
hsa05016	Huntington's disease	7/69	193/7197	0.0178897	EP300/HDAC1/HDAC2/POLR2A/PPARG/PPARGC1A/REST	7
hsa04310	Wnt signaling pathway	6/69	143/7197	0.0178897	CTBP1/CTBP2/EP300/JUN/MAP3K7/PPARD	6
hsa01522	Endocrine resistance	5/69	98/7197	0.0178897	CARM1/E2F1/ESR1/ESR2/JUN	5
hsa05216	Thyroid cancer	3/69	29/7197	0.0183187	PPARG/RXRA/RXRB	3
hsa05166	HTLV-I infection	8/69	258/7197	0.0207862	CD3E/E2F1/EP300/JUN/KAT2B/LCK/SRF/XPO1	8
hsa04931	Insulin resistance	5/69	109/7197	0.0243285	NR1H2/NR1H3/PPARA/PPARGC1A/STAT3	5
hsa05202	Transcriptional misregulation in cancer	6/69	180/7197	0.0449576	HDAC1/HDAC2/PPARG/RARA/RXRA/RXRB	6
hsa05168	Herpes simplex infection	6/69	185/7197	0.047307	EP300/JUN/MAP3K7/POLR2A/TNFRSF14/TRAF2	6
hsa05160	Hepatitis C	5/69	133/7197	0.047307	NR1H3/PPARA/RXRA/STAT3/TRAF2	5
hsa00270	Cysteine and methionine metabolism	3/69	45/7197	0.047307	DNMT1/DNMT3A/DNMT3B	3
hsa05222	Small cell lung cancer	4/69	86/7197	0.047307	E2F1/RXRA/RXRB/TRAF2	4

## Sheet: 7. Reactome terms
Term ID	Term Description	Gene Ratio	Background Ratio	BH adjusted p-value	Annotated Node Genes	Count
383280	Nuclear Receptor transcription pathway	25/72	51/6748	3.79292e-35	AR/ESR1/ESR2/ESRRA/ESRRB/ESRRG/HNF4A/NR0B1/NR1H2/NR1H3/NR2C1/NR3C1/NR3C2/NR5A1/NR5A2/PPARA/PPARD/PPARG/RARA/RORB/RXRA/RXRB/THRA/THRB/VDR	25
212436	Generic Transcription Pathway	30/72	189/6748	3.00691e-26	AR/CDK8/ESR1/ESR2/ESRRA/ESRRB/ESRRG/HDAC1/HNF4A/KAT2B/NR0B1/NR1H2/NR1H3/NR2C1/NR3C1/NR3C2/NR5A1/NR5A2/PPARA/PPARD/PPARG/RARA/RORB/RXRA/RXRB/THRA/THRB/VDR/YWHAH/YWHAQ	30
202430	Translocation of ZAP-70 to Immunological synapse	5/72	18/6748	0.000121691	CD247/CD3E/CD4/LCK/ZAP70	5
2122947	NOTCH1 Intracellular Domain Regulates Transcription	6/72	40/6748	0.000339941	CDK8/EP300/HDAC1/HDAC3/HDAC5/KAT2B	6
2644602	Signaling by NOTCH1 PEST Domain Mutants in Cancer	6/72	46/6748	0.000350551	CDK8/EP300/HDAC1/HDAC3/HDAC5/KAT2B	6
2644603	Signaling by NOTCH1 in Cancer	6/72	46/6748	0.000350551	CDK8/EP300/HDAC1/HDAC3/HDAC5/KAT2B	6
2644606	Constitutive Signaling by NOTCH1 PEST Domain Mutants	6/72	46/6748	0.000350551	CDK8/EP300/HDAC1/HDAC3/HDAC5/KAT2B	6
2894858	Signaling by NOTCH1 HD+PEST Domain Mutants in Cancer	6/72	46/6748	0.000350551	CDK8/EP300/HDAC1/HDAC3/HDAC5/KAT2B	6
2894862	Constitutive Signaling by NOTCH1 HD+PEST Domain Mutants	6/72	46/6748	0.000350551	CDK8/EP300/HDAC1/HDAC3/HDAC5/KAT2B	6
202433	Generation of second messenger molecules	5/72	31/6748	0.000649956	CD247/CD3E/CD4/LCK/ZAP70	5
193670	p75NTR negatively regulates cell cycle via SC1	3/72	6/6748	0.000817637	HDAC1/HDAC2/HDAC3	3
381340	Transcriptional regulation of white adipocyte differentiation	6/72	57/6748	0.000907632	CDK8/EP300/HDAC3/PPARG/PPARGC1A/RXRA	6
400253	Circadian Clock	5/72	35/6748	0.000907632	EP300/HDAC3/NRIP1/PPARA/PPARGC1A	5
157118	Signaling by NOTCH	7/72	86/6748	0.000907632	CDK8/E2F1/EP300/HDAC1/HDAC3/HDAC5/KAT2B	7
1980143	Signaling by NOTCH1	6/72	60/6748	0.000999388	CDK8/EP300/HDAC1/HDAC3/HDAC5/KAT2B	6
202427	Phosphorylation of CD3 and TCR zeta chains	4/72	20/6748	0.00125259	CD247/CD3E/CD4/LCK	4
202403	TCR signaling	6/72	64/6748	0.00127695	CD247/CD3E/CD4/LCK/MAP3K7/ZAP70	6
3247509	Chromatin modifying enzymes	10/72	216/6748	0.00175778	CARM1/DNMT3A/EP300/HDAC1/HDAC2/HDAC3/KAT2B/PHF8/PRMT1/REST	10
4839726	Chromatin organization	10/72	216/6748	0.00175778	CARM1/DNMT3A/EP300/HDAC1/HDAC2/HDAC3/KAT2B/PHF8/PRMT1/REST	10
389948	PD-1 signaling	4/72	23/6748	0.00175778	CD247/CD3E/CD4/LCK	4
1368082	RORA activates gene expression	3/72	9/6748	0.00175778	EP300/NRIP1/PPARGC1A	3
202424	Downstream TCR signaling	5/72	47/6748	0.00233618	CD247/CD3E/CD4/LCK/MAP3K7	5
5663202	Diseases of signal transduction	10/72	235/6748	0.00298955	CBL/CDK8/CTBP1/EP300/HDAC1/HDAC3/HDAC5/KAT2B/LCK/STAT3	10
388841	Costimulation by the CD28 family	5/72	54/6748	0.00416683	CD247/CD3E/CD4/LCK/TNFRSF14	5
5362517	Signaling by Retinoic Acid	4/72	42/6748	0.015514	PPARD/RARA/RXRA/RXRB	4
3214815	HDACs deacetylate histones	4/72	44/6748	0.0178039	HDAC1/HDAC2/HDAC3/REST	4
114452	Activation of BH3-only proteins	3/72	23/6748	0.0258922	E2F1/YWHAH/YWHAQ	3
164944	Nef and signal transduction	2/72	8/6748	0.0402701	CD247/LCK	2
4641265	repression of WNT target genes	2/72	8/6748	0.0402701	CTBP1/HDAC1	2
164952	The role of Nef in HIV-1 replication and disease pathogenesis	3/72	28/6748	0.0402701	CD247/CD4/LCK	3
212165	Epigenetic regulation of gene expression	5/72	94/6748	0.0402701	DNMT1/DNMT3A/DNMT3B/HDAC1/HDAC2	5
400206	Regulation of lipid metabolism by Peroxisome proliferator-activated receptor alpha (PPARalpha)	4/72	60/6748	0.0457131	CARM1/HDAC3/PPARA/RXRA	4
167590	Nef Mediated CD4 Down-regulation	2/72	9/6748	0.0460931	CD4/LCK	2
